# Supplementary material
Source: PubMed Central journal article supplement (PMC4987806)
Supplement: pnas.1519820113.sapp.pdf [file pnas.1519820113.sapp.pdf]

## ANALYSIS OF REPRODUCTIVE TRAITS

Our initial analyses did not reveal any association between early-life disease exposure and lifetime reproductive success (LRS), defined as the number of children an individual produced which survived to the age of 15. We performed additional analyses aiming to determine whether there were any associations between early-life disease exposure and important life-history traits which constitute lifetime reproductive success, namely:

1. Age at first reproduction
2. Number of children born (lifetime breeding success)
3. Children survival rate

For each of the three fitness traits, we tested models with exactly the same structure as for lifetime reproductive success in the main text, with analyses performed separately for females and males.

Analysis of age at first reproduction (AFR) was performed on 3226 individuals who survived to at least the age of 15, who were married and who produced at least one child. Analyses were performed separately for females (N=1681) and males (N=1545). We first considered the same set of model structures as for LRS in the main text, and found that using Box-Cox transformation to select a power transformation ( $AFR^{-1}$ ) provided the most favourable model diagnostics for both males and females. We multiplied  $AFR^{-1}$  by 100 to enhance interpretation of fixed effects estimates. We fitted linear mixed-effects models of the same fixed and random effects structure as for LRS. Analysis of lifetime breeding success (LBS) was performed on data from 3415 individuals who married and survived to the age of 50,

with separate analyses performed on data from females (N=1780) and males (N=1635) using linear mixed-effects model of untransformed LBS, a structure which provided better diagnostics than any other model structure. Finally, child survival rate was analysed using a binomial generalized linear mixed-effects model (GLMM) on data collected from 1512 females and 1331 males who married, survived to age 50, produced at least one child, and where the fate of all children was known to age 15. The response variable was passed to the model as (number of success, number of failures); specifically in this case it was (number of children surviving to age 15, number of children dying before age 15).

The results of these analyses are reported briefly in the main text, with more detail provided in Tables S9-S11.

**Table S1: The number and proportion of individuals falling into each category of the explanatory variables included in our statistical analyses**

| <b>Variable</b>               | <b>Subset</b> | <b>N</b> | <b>Percentage</b> |
|-------------------------------|---------------|----------|-------------------|
| Parish                        | Ikaalinen     | 1105     | 15.17%            |
|                               | Hiittinen     | 2551     | 35.03%            |
|                               | Jaakkima      | 320      | 4.39%             |
|                               | Kustavi       | 807      | 11.08%            |
|                               | Pulkkila      | 1502     | 20.62%            |
|                               | Rautu         | 258      | 3.54%             |
|                               | Rymättylä     | 740      | 10.16%            |
| Social class                  | Rich          | 4981     | 68.39%            |
|                               | Poor          | 2302     | 31.61%            |
| Sex                           | Female        | 3688     | 50.64%            |
|                               | Male          | 3595     | 49.36%            |
| Inter-birth interval<br>(IBI) | 0             | 1578     | 21.67%            |
|                               | $\leq 2$      | 1695     | 23.27%            |
|                               | $\leq 3$      | 2369     | 32.53%            |
|                               | $> 3$         | 1641     | 22.53%            |
| Birth type                    | Single        | 7027     | 96.48%            |
|                               | Twin          | 256      | 3.52%             |
| Birth season                  | High survival | 1817     | 24.95%            |
|                               | Low survival  | 5466     | 75.05%            |

Categories of IBI are as follows: 0 = firstborn;  $\leq 2$  = born less than or equal to two years after a mother's previous child;  $\leq 3$  = more than two but less than or equal to three years after their mother's previous child;  $> 3$  = born more than three years after their mother's previous child.

**Table S2: Data showing the calculation of our measure of early-life disease exposure for each of our seven parishes.**

| Parish | Year | Alive | Known fate | Deaths of known cause |        | Deaths of infections |        | Deaths of non-infectious causes |        | Survivors |        |
|--------|------|-------|------------|-----------------------|--------|----------------------|--------|---------------------------------|--------|-----------|--------|
|        |      |       |            | N                     | Prop   | N                    | Prop   | N                               | Prop   | N         | Prop   |
| HII    | 1751 | 76    | 75         | 2                     | 0.0267 | 2                    | 0.0267 | 0                               | 0.0000 | 73        | 0.9733 |
| HII    | 1752 | 77    | 77         | 1                     | 0.0130 | 0                    | 0.0000 | 1                               | 0.0130 | 76        | 0.9870 |
| HII    | 1753 | 86    | 83         | 1                     | 0.0120 | 0                    | 0.0000 | 1                               | 0.0120 | 82        | 0.9880 |
| HII    | 1754 | 84    | 82         | 2                     | 0.0244 | 0                    | 0.0000 | 2                               | 0.0244 | 80        | 0.9756 |
| HII    | 1755 | 93    | 93         | 10                    | 0.1075 | 10                   | 0.1075 | 0                               | 0.0000 | 83        | 0.8925 |
| HII    | 1756 | 92    | 92         | 0                     | 0.0000 | 0                    | 0.0000 | 0                               | 0.0000 | 92        | 1.0000 |
| HII    | 1757 | 92    | 92         | 4                     | 0.0435 | 4                    | 0.0435 | 0                               | 0.0000 | 88        | 0.9565 |
| HII    | 1758 | 90    | 90         | 3                     | 0.0333 | 2                    | 0.0222 | 1                               | 0.0111 | 87        | 0.9667 |
| HII    | 1759 | 90    | 89         | 2                     | 0.0225 | 2                    | 0.0225 | 0                               | 0.0000 | 87        | 0.9775 |
| HII    | 1760 | 91    | 91         | 2                     | 0.0220 | 2                    | 0.0220 | 0                               | 0.0000 | 89        | 0.9780 |
| HII    | 1761 | 93    | 93         | 7                     | 0.0753 | 7                    | 0.0753 | 0                               | 0.0000 | 86        | 0.9247 |
| HII    | 1762 | 89    | 89         | 2                     | 0.0225 | 2                    | 0.0225 | 0                               | 0.0000 | 87        | 0.9775 |
| HII    | 1763 | 104   | 104        | 6                     | 0.0577 | 6                    | 0.0577 | 0                               | 0.0000 | 98        | 0.9423 |
| HII    | 1764 | 106   | 106        | 3                     | 0.0283 | 3                    | 0.0283 | 0                               | 0.0000 | 103       | 0.9717 |
| HII    | 1765 | 117   | 116        | 2                     | 0.0172 | 2                    | 0.0172 | 0                               | 0.0000 | 114       | 0.9828 |
| HII    | 1766 | 131   | 130        | 2                     | 0.0154 | 2                    | 0.0154 | 0                               | 0.0000 | 128       | 0.9846 |
| HII    | 1767 | 131   | 129        | 17                    | 0.1318 | 17                   | 0.1318 | 0                               | 0.0000 | 112       | 0.8682 |
| HII    | 1768 | 126   | 125        | 6                     | 0.0480 | 6                    | 0.0480 | 0                               | 0.0000 | 119       | 0.9520 |
| HII    | 1769 | 135   | 131        | 4                     | 0.0305 | 3                    | 0.0229 | 1                               | 0.0076 | 127       | 0.9695 |
| HII    | 1770 | 147   | 146        | 4                     | 0.0274 | 4                    | 0.0274 | 0                               | 0.0000 | 142       | 0.9726 |

| Parish | Year | Alive | Known fate | Deaths of known cause |        | Deaths of infections |        | Deaths of non-infectious causes |        | Survivors |        |
|--------|------|-------|------------|-----------------------|--------|----------------------|--------|---------------------------------|--------|-----------|--------|
|        |      |       |            | N                     | Prop   | N                    | Prop   | N                               | Prop   | N         | Prop   |
| HII    | 1771 | 152   | 149        | 1                     | 0.0067 | 1                    | 0.0067 | 0                               | 0.0000 | 148       | 0.9933 |
| HII    | 1772 | 159   | 159        | 5                     | 0.0314 | 5                    | 0.0314 | 0                               | 0.0000 | 154       | 0.9686 |
| HII    | 1773 | 163   | 163        | 2                     | 0.0123 | 2                    | 0.0123 | 0                               | 0.0000 | 161       | 0.9877 |
| HII    | 1774 | 167   | 166        | 4                     | 0.0241 | 3                    | 0.0181 | 1                               | 0.0060 | 162       | 0.9759 |
| HII    | 1775 | 159   | 157        | 4                     | 0.0255 | 4                    | 0.0255 | 0                               | 0.0000 | 153       | 0.9745 |
| HII    | 1776 | 162   | 161        | 3                     | 0.0186 | 3                    | 0.0186 | 0                               | 0.0000 | 158       | 0.9814 |
| HII    | 1777 | 153   | 153        | 7                     | 0.0458 | 6                    | 0.0392 | 1                               | 0.0065 | 146       | 0.9542 |
| HII    | 1778 | 156   | 154        | 3                     | 0.0195 | 2                    | 0.0130 | 1                               | 0.0065 | 151       | 0.9805 |
| HII    | 1779 | 159   | 150        | 2                     | 0.0133 | 2                    | 0.0133 | 0                               | 0.0000 | 148       | 0.9867 |
| HII    | 1780 | 152   | 149        | 2                     | 0.0134 | 2                    | 0.0134 | 0                               | 0.0000 | 147       | 0.9866 |
| HII    | 1781 | 153   | 149        | 7                     | 0.0470 | 4                    | 0.0268 | 3                               | 0.0201 | 142       | 0.9530 |
| HII    | 1782 | 142   | 139        | 1                     | 0.0072 | 1                    | 0.0072 | 0                               | 0.0000 | 138       | 0.9928 |
| HII    | 1783 | 138   | 136        | 4                     | 0.0294 | 2                    | 0.0147 | 2                               | 0.0147 | 132       | 0.9706 |
| HII    | 1784 | 145   | 138        | 0                     | 0.0000 | 0                    | 0.0000 | 0                               | 0.0000 | 138       | 1.0000 |
| HII    | 1785 | 147   | 144        | 2                     | 0.0139 | 1                    | 0.0069 | 1                               | 0.0069 | 142       | 0.9861 |
| HII    | 1786 | 162   | 158        | 3                     | 0.0190 | 1                    | 0.0063 | 2                               | 0.0127 | 155       | 0.9810 |
| HII    | 1787 | 155   | 152        | 6                     | 0.0395 | 3                    | 0.0197 | 3                               | 0.0197 | 146       | 0.9605 |
| HII    | 1788 | 153   | 150        | 4                     | 0.0267 | 2                    | 0.0133 | 2                               | 0.0133 | 146       | 0.9733 |
| HII    | 1789 | 151   | 147        | 3                     | 0.0204 | 2                    | 0.0136 | 1                               | 0.0068 | 144       | 0.9796 |
| HII    | 1790 | 142   | 141        | 4                     | 0.0284 | 3                    | 0.0213 | 1                               | 0.0071 | 137       | 0.9716 |
| HII    | 1791 | 147   | 146        | 2                     | 0.0137 | 1                    | 0.0068 | 1                               | 0.0068 | 144       | 0.9863 |
| HII    | 1792 | 159   | 159        | 3                     | 0.0189 | 1                    | 0.0063 | 2                               | 0.0126 | 156       | 0.9811 |
| HII    | 1793 | 173   | 170        | 0                     | 0.0000 | 0                    | 0.0000 | 0                               | 0.0000 | 170       | 1.0000 |
| HII    | 1794 | 186   | 184        | 5                     | 0.0272 | 4                    | 0.0217 | 1                               | 0.0054 | 179       | 0.9728 |
| HII    | 1795 | 199   | 199        | 7                     | 0.0352 | 3                    | 0.0151 | 4                               | 0.0201 | 192       | 0.9648 |

| Parish | Year | Alive | Known fate | Deaths of known cause |        | Deaths of infections |        | Deaths of non-infectious causes |        | Survivors |        |
|--------|------|-------|------------|-----------------------|--------|----------------------|--------|---------------------------------|--------|-----------|--------|
|        |      |       |            | N                     | Prop   | N                    | Prop   | N                               | Prop   | N         | Prop   |
| HII    | 1796 | 197   | 195        | 2                     | 0.0103 | 2                    | 0.0103 | 0                               | 0.0000 | 193       | 0.9897 |
| HII    | 1797 | 209   | 207        | 2                     | 0.0097 | 2                    | 0.0097 | 0                               | 0.0000 | 205       | 0.9903 |
| HII    | 1798 | 229   | 227        | 3                     | 0.0132 | 3                    | 0.0132 | 0                               | 0.0000 | 224       | 0.9868 |
| HII    | 1799 | 239   | 231        | 7                     | 0.0303 | 1                    | 0.0043 | 6                               | 0.0260 | 224       | 0.9697 |
| HII    | 1800 | 244   | 242        | 11                    | 0.0455 | 10                   | 0.0413 | 1                               | 0.0041 | 231       | 0.9545 |
| HII    | 1801 | 257   | 255        | 5                     | 0.0196 | 4                    | 0.0157 | 1                               | 0.0039 | 250       | 0.9804 |
| HII    | 1802 | 263   | 259        | 1                     | 0.0039 | 0                    | 0.0000 | 1                               | 0.0039 | 258       | 0.9961 |
| HII    | 1803 | 257   | 255        | 6                     | 0.0235 | 4                    | 0.0157 | 2                               | 0.0078 | 249       | 0.9765 |
| HII    | 1804 | 267   | 261        | 7                     | 0.0268 | 6                    | 0.0230 | 1                               | 0.0038 | 254       | 0.9732 |
| HII    | 1805 | 259   | 255        | 1                     | 0.0039 | 0                    | 0.0000 | 1                               | 0.0039 | 254       | 0.9961 |
| HII    | 1806 | 253   | 253        | 5                     | 0.0198 | 5                    | 0.0198 | 0                               | 0.0000 | 248       | 0.9802 |
| HII    | 1807 | 262   | 260        | 6                     | 0.0231 | 3                    | 0.0115 | 3                               | 0.0115 | 254       | 0.9769 |
| HII    | 1808 | 259   | 257        | 16                    | 0.0623 | 10                   | 0.0389 | 6                               | 0.0233 | 241       | 0.9377 |
| HII    | 1809 | 238   | 237        | 4                     | 0.0169 | 2                    | 0.0084 | 2                               | 0.0084 | 233       | 0.9831 |
| HII    | 1810 | 248   | 244        | 4                     | 0.0164 | 4                    | 0.0164 | 0                               | 0.0000 | 240       | 0.9836 |
| HII    | 1811 | 252   | 250        | 9                     | 0.0360 | 5                    | 0.0200 | 4                               | 0.0160 | 241       | 0.9640 |
| HII    | 1812 | 248   | 247        | 7                     | 0.0283 | 4                    | 0.0162 | 3                               | 0.0121 | 240       | 0.9717 |
| HII    | 1813 | 254   | 253        | 12                    | 0.0474 | 6                    | 0.0237 | 6                               | 0.0237 | 241       | 0.9526 |
| HII    | 1814 | 256   | 254        | 13                    | 0.0512 | 7                    | 0.0276 | 6                               | 0.0236 | 241       | 0.9488 |
| HII    | 1815 | 252   | 251        | 10                    | 0.0398 | 6                    | 0.0239 | 4                               | 0.0159 | 241       | 0.9602 |
| HII    | 1816 | 250   | 249        | 5                     | 0.0201 | 1                    | 0.0040 | 4                               | 0.0161 | 244       | 0.9799 |
| HII    | 1817 | 254   | 254        | 3                     | 0.0118 | 0                    | 0.0000 | 3                               | 0.0118 | 251       | 0.9882 |
| HII    | 1818 | 264   | 261        | 8                     | 0.0307 | 2                    | 0.0077 | 6                               | 0.0230 | 253       | 0.9693 |
| HII    | 1819 | 265   | 263        | 10                    | 0.0380 | 8                    | 0.0304 | 2                               | 0.0076 | 253       | 0.9620 |
| HII    | 1820 | 272   | 271        | 8                     | 0.0295 | 7                    | 0.0258 | 1                               | 0.0037 | 263       | 0.9705 |

| Parish | Year | Alive | Known fate | Deaths of known cause |        | Deaths of infections |        | Deaths of non-infectious causes |        | Survivors |        |
|--------|------|-------|------------|-----------------------|--------|----------------------|--------|---------------------------------|--------|-----------|--------|
|        |      |       |            | N                     | Prop   | N                    | Prop   | N                               | Prop   | N         | Prop   |
| HII    | 1821 | 273   | 272        | 12                    | 0.0441 | 5                    | 0.0184 | 7                               | 0.0257 | 260       | 0.9559 |
| HII    | 1822 | 272   | 271        | 7                     | 0.0258 | 4                    | 0.0148 | 3                               | 0.0111 | 264       | 0.9742 |
| HII    | 1823 | 275   | 274        | 5                     | 0.0182 | 3                    | 0.0109 | 2                               | 0.0073 | 269       | 0.9818 |
| HII    | 1824 | 283   | 283        | 12                    | 0.0424 | 6                    | 0.0212 | 6                               | 0.0212 | 271       | 0.9576 |
| HII    | 1825 | 279   | 278        | 4                     | 0.0144 | 3                    | 0.0108 | 1                               | 0.0036 | 274       | 0.9856 |
| HII    | 1826 | 284   | 283        | 2                     | 0.0071 | 2                    | 0.0071 | 0                               | 0.0000 | 281       | 0.9929 |
| HII    | 1827 | 290   | 290        | 2                     | 0.0069 | 1                    | 0.0034 | 1                               | 0.0034 | 288       | 0.9931 |
| HII    | 1828 | 288   | 287        | 7                     | 0.0244 | 5                    | 0.0174 | 2                               | 0.0070 | 280       | 0.9756 |
| HII    | 1829 | 291   | 290        | 6                     | 0.0207 | 4                    | 0.0138 | 2                               | 0.0069 | 284       | 0.9793 |
| HII    | 1830 | 302   | 302        | 20                    | 0.0662 | 19                   | 0.0629 | 1                               | 0.0033 | 282       | 0.9338 |
| HII    | 1831 | 291   | 290        | 6                     | 0.0207 | 3                    | 0.0103 | 3                               | 0.0103 | 284       | 0.9793 |
| HII    | 1832 | 288   | 288        | 3                     | 0.0104 | 3                    | 0.0104 | 0                               | 0.0000 | 285       | 0.9896 |
| HII    | 1833 | 293   | 292        | 5                     | 0.0171 | 3                    | 0.0103 | 2                               | 0.0068 | 287       | 0.9829 |
| HII    | 1834 | 291   | 288        | 5                     | 0.0174 | 3                    | 0.0104 | 2                               | 0.0069 | 283       | 0.9826 |
| HII    | 1835 | 298   | 298        | 1                     | 0.0034 | 0                    | 0.0000 | 1                               | 0.0034 | 297       | 0.9966 |
| HII    | 1836 | 310   | 310        | 4                     | 0.0129 | 2                    | 0.0065 | 2                               | 0.0065 | 306       | 0.9871 |
| HII    | 1837 | 320   | 320        | 7                     | 0.0219 | 5                    | 0.0156 | 2                               | 0.0063 | 313       | 0.9781 |
| HII    | 1838 | 330   | 329        | 13                    | 0.0395 | 9                    | 0.0274 | 4                               | 0.0122 | 316       | 0.9605 |
| HII    | 1839 | 328   | 328        | 10                    | 0.0305 | 9                    | 0.0274 | 1                               | 0.0030 | 318       | 0.9695 |
| HII    | 1840 | 344   | 342        | 17                    | 0.0497 | 10                   | 0.0292 | 7                               | 0.0205 | 325       | 0.9503 |
| HII    | 1841 | 334   | 333        | 9                     | 0.0270 | 5                    | 0.0150 | 4                               | 0.0120 | 324       | 0.9730 |
| HII    | 1842 | 340   | 340        | 9                     | 0.0265 | 5                    | 0.0147 | 4                               | 0.0118 | 331       | 0.9735 |
| HII    | 1843 | 355   | 355        | 4                     | 0.0113 | 2                    | 0.0056 | 2                               | 0.0056 | 351       | 0.9887 |
| HII    | 1844 | 360   | 360        | 11                    | 0.0306 | 5                    | 0.0139 | 6                               | 0.0167 | 349       | 0.9694 |
| HII    | 1845 | 364   | 364        | 4                     | 0.0110 | 1                    | 0.0027 | 3                               | 0.0082 | 360       | 0.9890 |

| Parish | Year | Alive | Known fate | Deaths of known cause |        | Deaths of infections |        | Deaths of non-infectious causes |        | Survivors |         |
|--------|------|-------|------------|-----------------------|--------|----------------------|--------|---------------------------------|--------|-----------|---------|
|        |      |       |            | N                     | Prop   | N                    | Prop   | N                               | Prop   | N         | Prop    |
| HII    | 1846 | 366   | 366        | 8                     | 0.0219 | 5                    | 0.0137 | 3                               | 0.0082 | 358       | 0.9781  |
| HII    | 1847 | 364   | 363        | 14                    | 0.0386 | 11                   | 0.0303 | 3                               | 0.0083 | 349       | 0.9614  |
| HII    | 1848 | 361   | 357        | 14                    | 0.0392 | 7                    | 0.0196 | 7                               | 0.0196 | 343       | 0.9608  |
| HII    | 1849 | 369   | 367        | 12                    | 0.0327 | 11                   | 0.0300 | 1                               | 0.0027 | 355       | 0.9673  |
| HII    | 1850 | 380   | 379        | 5                     | 0.0132 | 5                    | 0.0132 | 0                               | 0.0000 | 374       | 0.9868  |
| HII    | 1851 | 376   | 375        | 7                     | 0.0187 | 6                    | 0.0160 | 1                               | 0.0027 | 368       | 8.0000  |
| HII    | 1852 | 381   | 380        | 19                    | 0.0500 | 17                   | 0.0447 | 2                               | 0.0053 | 361       | 20.0000 |
| HII    | 1853 | 370   | 369        | 16                    | 0.0434 | 16                   | 0.0434 | 0                               | 0.0000 | 353       | 17.0000 |
| HII    | 1854 | 362   | 358        | 7                     | 0.0196 | 7                    | 0.0196 | 0                               | 0.0000 | 351       | 11.0000 |
| HII    | 1855 | 350   | 344        | 10                    | 0.0291 | 9                    | 0.0262 | 1                               | 0.0029 | 334       | 16.0000 |
| IKA    | 1751 | 38    | 38         | 0                     | 0.0000 | 0                    | 0.0000 | 0                               | 0.0000 | 38        | 1.0000  |
| IKA    | 1752 | 39    | 39         | 0                     | 0.0000 | 0                    | 0.0000 | 0                               | 0.0000 | 39        | 1.0000  |
| IKA    | 1753 | 40    | 40         | 0                     | 0.0000 | 0                    | 0.0000 | 0                               | 0.0000 | 40        | 1.0000  |
| IKA    | 1754 | 41    | 41         | 0                     | 0.0000 | 0                    | 0.0000 | 0                               | 0.0000 | 41        | 1.0000  |
| IKA    | 1755 | 41    | 41         | 0                     | 0.0000 | 0                    | 0.0000 | 0                               | 0.0000 | 41        | 1.0000  |
| IKA    | 1756 | 43    | 43         | 0                     | 0.0000 | 0                    | 0.0000 | 0                               | 0.0000 | 43        | 1.0000  |
| IKA    | 1757 | 42    | 42         | 0                     | 0.0000 | 0                    | 0.0000 | 0                               | 0.0000 | 42        | 1.0000  |
| IKA    | 1758 | 40    | 40         | 0                     | 0.0000 | 0                    | 0.0000 | 0                               | 0.0000 | 40        | 1.0000  |
| IKA    | 1759 | 42    | 42         | 0                     | 0.0000 | 0                    | 0.0000 | 0                               | 0.0000 | 42        | 1.0000  |
| IKA    | 1760 | 48    | 48         | 1                     | 0.0208 | 1                    | 0.0208 | 0                               | 0.0000 | 47        | 0.9792  |
| IKA    | 1761 | 49    | 49         | 0                     | 0.0000 | 0                    | 0.0000 | 0                               | 0.0000 | 49        | 1.0000  |
| IKA    | 1762 | 59    | 59         | 0                     | 0.0000 | 0                    | 0.0000 | 0                               | 0.0000 | 59        | 1.0000  |
| IKA    | 1763 | 69    | 69         | 0                     | 0.0000 | 0                    | 0.0000 | 0                               | 0.0000 | 69        | 1.0000  |
| IKA    | 1764 | 73    | 73         | 3                     | 0.0411 | 3                    | 0.0411 | 0                               | 0.0000 | 70        | 0.9589  |
| IKA    | 1765 | 77    | 77         | 1                     | 0.0130 | 1                    | 0.0130 | 0                               | 0.0000 | 76        | 0.9870  |



| Parish | Year | Alive | Known fate | Deaths of known cause |        | Deaths of infections |        | Deaths of non-infectious causes |        | Survivors |        |
|--------|------|-------|------------|-----------------------|--------|----------------------|--------|---------------------------------|--------|-----------|--------|
|        |      |       |            | N                     | Prop   | N                    | Prop   | N                               | Prop   | N         | Prop   |
| IKA    | 1766 | 88    | 88         | 2                     | 0.0227 | 2                    | 0.0227 | 0                               | 0.0000 | 86        | 0.9773 |
| IKA    | 1767 | 95    | 94         | 1                     | 0.0106 | 1                    | 0.0106 | 0                               | 0.0000 | 93        | 0.9894 |
| IKA    | 1768 | 106   | 106        | 2                     | 0.0189 | 2                    | 0.0189 | 0                               | 0.0000 | 104       | 0.9811 |
| IKA    | 1769 | 119   | 119        | 2                     | 0.0168 | 2                    | 0.0168 | 0                               | 0.0000 | 117       | 0.9832 |
| IKA    | 1770 | 123   | 123        | 5                     | 0.0407 | 5                    | 0.0407 | 0                               | 0.0000 | 118       | 0.9593 |
| IKA    | 1771 | 133   | 133        | 2                     | 0.0150 | 2                    | 0.0150 | 0                               | 0.0000 | 131       | 0.9850 |
| IKA    | 1772 | 144   | 144        | 0                     | 0.0000 | 0                    | 0.0000 | 0                               | 0.0000 | 144       | 1.0000 |
| IKA    | 1773 | 149   | 149        | 2                     | 0.0134 | 2                    | 0.0134 | 0                               | 0.0000 | 147       | 0.9866 |
| IKA    | 1774 | 157   | 157        | 2                     | 0.0127 | 2                    | 0.0127 | 0                               | 0.0000 | 155       | 0.9873 |
| IKA    | 1775 | 169   | 169        | 4                     | 0.0237 | 4                    | 0.0237 | 0                               | 0.0000 | 165       | 0.9763 |
| IKA    | 1776 | 175   | 175        | 3                     | 0.0171 | 3                    | 0.0171 | 0                               | 0.0000 | 172       | 0.9829 |
| IKA    | 1777 | 182   | 182        | 7                     | 0.0385 | 6                    | 0.0330 | 1                               | 0.0055 | 175       | 0.9615 |
| IKA    | 1778 | 196   | 193        | 4                     | 0.0207 | 4                    | 0.0207 | 0                               | 0.0000 | 189       | 0.9793 |
| IKA    | 1779 | 200   | 198        | 3                     | 0.0152 | 2                    | 0.0101 | 1                               | 0.0051 | 195       | 0.9848 |
| IKA    | 1780 | 206   | 206        | 6                     | 0.0291 | 6                    | 0.0291 | 0                               | 0.0000 | 200       | 0.9709 |
| IKA    | 1781 | 225   | 225        | 14                    | 0.0622 | 13                   | 0.0578 | 1                               | 0.0044 | 211       | 0.9378 |
| IKA    | 1782 | 221   | 220        | 4                     | 0.0182 | 4                    | 0.0182 | 0                               | 0.0000 | 216       | 0.9818 |
| IKA    | 1783 | 236   | 234        | 8                     | 0.0342 | 7                    | 0.0299 | 1                               | 0.0043 | 226       | 0.9658 |
| IKA    | 1784 | 246   | 245        | 6                     | 0.0245 | 6                    | 0.0245 | 0                               | 0.0000 | 239       | 0.9755 |
| IKA    | 1785 | 247   | 247        | 8                     | 0.0324 | 8                    | 0.0324 | 0                               | 0.0000 | 239       | 0.9676 |
| IKA    | 1786 | 257   | 256        | 7                     | 0.0273 | 7                    | 0.0273 | 0                               | 0.0000 | 249       | 0.9727 |
| IKA    | 1787 | 269   | 266        | 3                     | 0.0113 | 3                    | 0.0113 | 0                               | 0.0000 | 263       | 0.9887 |
| IKA    | 1788 | 273   | 272        | 4                     | 0.0147 | 4                    | 0.0147 | 0                               | 0.0000 | 268       | 0.9853 |
| IKA    | 1789 | 266   | 266        | 11                    | 0.0414 | 11                   | 0.0414 | 0                               | 0.0000 | 255       | 0.9586 |
| IKA    | 1790 | 268   | 268        | 11                    | 0.0410 | 11                   | 0.0410 | 0                               | 0.0000 | 257       | 0.9590 |

| Parish | Year | Alive | Known fate | Deaths of known cause |        | Deaths of infections |        | Deaths of non-infectious causes |        | Survivors |        |
|--------|------|-------|------------|-----------------------|--------|----------------------|--------|---------------------------------|--------|-----------|--------|
|        |      |       |            | N                     | Prop   | N                    | Prop   | N                               | Prop   | N         | Prop   |
| IKA    | 1791 | 282   | 279        | 6                     | 0.0215 | 4                    | 0.0143 | 2                               | 0.0072 | 273       | 0.9785 |
| IKA    | 1792 | 288   | 287        | 3                     | 0.0105 | 2                    | 0.0070 | 1                               | 0.0035 | 284       | 0.9895 |
| IKA    | 1793 | 303   | 302        | 8                     | 0.0265 | 8                    | 0.0265 | 0                               | 0.0000 | 294       | 0.9735 |
| IKA    | 1794 | 320   | 319        | 13                    | 0.0408 | 12                   | 0.0376 | 1                               | 0.0031 | 306       | 0.9592 |
| IKA    | 1795 | 339   | 337        | 2                     | 0.0059 | 2                    | 0.0059 | 0                               | 0.0000 | 335       | 0.9941 |
| IKA    | 1796 | 362   | 359        | 2                     | 0.0056 | 2                    | 0.0056 | 0                               | 0.0000 | 357       | 0.9944 |
| IKA    | 1797 | 374   | 373        | 2                     | 0.0054 | 2                    | 0.0054 | 0                               | 0.0000 | 371       | 0.9946 |
| IKA    | 1798 | 396   | 395        | 21                    | 0.0532 | 21                   | 0.0532 | 0                               | 0.0000 | 374       | 0.9468 |
| IKA    | 1799 | 410   | 408        | 5                     | 0.0123 | 5                    | 0.0123 | 0                               | 0.0000 | 403       | 0.9877 |
| IKA    | 1800 | 445   | 444        | 10                    | 0.0225 | 9                    | 0.0203 | 1                               | 0.0023 | 434       | 0.9775 |
| IKA    | 1801 | 476   | 475        | 9                     | 0.0189 | 7                    | 0.0147 | 2                               | 0.0042 | 466       | 0.9811 |
| IKA    | 1802 | 495   | 493        | 16                    | 0.0325 | 11                   | 0.0223 | 5                               | 0.0101 | 477       | 0.9675 |
| IKA    | 1803 | 498   | 498        | 6                     | 0.0120 | 5                    | 0.0100 | 1                               | 0.0020 | 492       | 0.9880 |
| IKA    | 1804 | 533   | 533        | 11                    | 0.0206 | 11                   | 0.0206 | 0                               | 0.0000 | 522       | 0.9794 |
| IKA    | 1805 | 543   | 543        | 11                    | 0.0203 | 7                    | 0.0129 | 4                               | 0.0074 | 532       | 0.9797 |
| IKA    | 1806 | 546   | 546        | 19                    | 0.0348 | 18                   | 0.0330 | 1                               | 0.0018 | 527       | 0.9652 |
| IKA    | 1807 | 544   | 540        | 24                    | 0.0444 | 24                   | 0.0444 | 0                               | 0.0000 | 516       | 0.9556 |
| IKA    | 1808 | 533   | 533        | 13                    | 0.0244 | 12                   | 0.0225 | 1                               | 0.0019 | 520       | 0.9756 |
| IKA    | 1809 | 540   | 536        | 61                    | 0.1138 | 59                   | 0.1101 | 2                               | 0.0037 | 475       | 0.8862 |
| IKA    | 1810 | 511   | 508        | 14                    | 0.0276 | 12                   | 0.0236 | 2                               | 0.0039 | 494       | 0.9724 |
| IKA    | 1811 | 520   | 519        | 10                    | 0.0193 | 9                    | 0.0173 | 1                               | 0.0019 | 509       | 0.9807 |
| IKA    | 1812 | 527   | 523        | 3                     | 0.0057 | 2                    | 0.0038 | 1                               | 0.0019 | 520       | 0.9943 |
| IKA    | 1813 | 537   | 532        | 9                     | 0.0169 | 9                    | 0.0169 | 0                               | 0.0000 | 523       | 0.9831 |
| IKA    | 1814 | 544   | 542        | 44                    | 0.0812 | 37                   | 0.0683 | 7                               | 0.0129 | 498       | 0.9188 |
| IKA    | 1815 | 538   | 537        | 7                     | 0.0130 | 4                    | 0.0074 | 3                               | 0.0056 | 530       | 0.9870 |

| Parish | Year | Alive | Known fate | Deaths of known cause |        | Deaths of infections |        | Deaths of non-infectious causes |        | Survivors |        |
|--------|------|-------|------------|-----------------------|--------|----------------------|--------|---------------------------------|--------|-----------|--------|
|        |      |       |            | N                     | Prop   | N                    | Prop   | N                               | Prop   | N         | Prop   |
| IKA    | 1816 | 570   | 570        | 14                    | 0.0246 | 10                   | 0.0175 | 4                               | 0.0070 | 556       | 0.9754 |
| IKA    | 1817 | 610   | 607        | 12                    | 0.0198 | 12                   | 0.0198 | 0                               | 0.0000 | 595       | 0.9802 |
| IKA    | 1818 | 637   | 636        | 19                    | 0.0299 | 17                   | 0.0267 | 2                               | 0.0031 | 617       | 0.9701 |
| IKA    | 1819 | 692   | 689        | 20                    | 0.0290 | 12                   | 0.0174 | 8                               | 0.0116 | 669       | 0.9710 |
| IKA    | 1820 | 737   | 736        | 19                    | 0.0258 | 16                   | 0.0217 | 3                               | 0.0041 | 717       | 0.9742 |
| IKA    | 1821 | 773   | 768        | 19                    | 0.0247 | 16                   | 0.0208 | 3                               | 0.0039 | 749       | 0.9753 |
| IKA    | 1822 | 794   | 791        | 33                    | 0.0417 | 31                   | 0.0392 | 2                               | 0.0025 | 758       | 0.9583 |
| IKA    | 1823 | 831   | 831        | 30                    | 0.0361 | 25                   | 0.0301 | 5                               | 0.0060 | 801       | 0.9639 |
| IKA    | 1824 | 857   | 856        | 16                    | 0.0187 | 13                   | 0.0152 | 3                               | 0.0035 | 840       | 0.9813 |
| IKA    | 1825 | 897   | 892        | 22                    | 0.0247 | 21                   | 0.0235 | 1                               | 0.0011 | 870       | 0.9753 |
| IKA    | 1826 | 926   | 920        | 16                    | 0.0174 | 10                   | 0.0109 | 6                               | 0.0065 | 904       | 0.9826 |
| IKA    | 1827 | 977   | 975        | 19                    | 0.0195 | 15                   | 0.0154 | 4                               | 0.0041 | 956       | 0.9805 |
| IKA    | 1828 | 1013  | 1012       | 17                    | 0.0168 | 15                   | 0.0148 | 2                               | 0.0020 | 995       | 0.9832 |
| IKA    | 1829 | 1052  | 1050       | 46                    | 0.0438 | 34                   | 0.0324 | 12                              | 0.0114 | 1004      | 0.9562 |
| IKA    | 1830 | 1050  | 1047       | 19                    | 0.0181 | 15                   | 0.0143 | 4                               | 0.0038 | 1028      | 0.9819 |
| IKA    | 1831 | 1089  | 1089       | 18                    | 0.0165 | 15                   | 0.0138 | 3                               | 0.0028 | 1071      | 0.9835 |
| IKA    | 1832 | 1087  | 1086       | 50                    | 0.0460 | 48                   | 0.0442 | 2                               | 0.0018 | 1036      | 0.9540 |
| IKA    | 1833 | 1077  | 1075       | 18                    | 0.0167 | 14                   | 0.0130 | 4                               | 0.0037 | 1057      | 0.9833 |
| IKA    | 1834 | 1095  | 1093       | 38                    | 0.0348 | 33                   | 0.0302 | 5                               | 0.0046 | 1055      | 0.9652 |
| IKA    | 1835 | 1114  | 1113       | 18                    | 0.0162 | 13                   | 0.0117 | 5                               | 0.0045 | 1095      | 0.9838 |
| IKA    | 1836 | 1133  | 1132       | 28                    | 0.0247 | 19                   | 0.0168 | 9                               | 0.0080 | 1104      | 0.9753 |
| IKA    | 1837 | 1124  | 1121       | 42                    | 0.0375 | 31                   | 0.0277 | 11                              | 0.0098 | 1079      | 0.9625 |
| IKA    | 1838 | 1086  | 1085       | 19                    | 0.0175 | 14                   | 0.0129 | 5                               | 0.0046 | 1066      | 0.9825 |
| IKA    | 1839 | 1122  | 1122       | 29                    | 0.0258 | 21                   | 0.0187 | 8                               | 0.0071 | 1093      | 0.9742 |
| IKA    | 1840 | 1146  | 1143       | 21                    | 0.0184 | 13                   | 0.0114 | 8                               | 0.0070 | 1122      | 0.9816 |

| Parish | Year | Alive | Known fate | Deaths of known cause |        | Deaths of infections |        | Deaths of non-infectious causes |        | Survivors |         |
|--------|------|-------|------------|-----------------------|--------|----------------------|--------|---------------------------------|--------|-----------|---------|
|        |      |       |            | N                     | Prop   | N                    | Prop   | N                               | Prop   | N         | Prop    |
| IKA    | 1841 | 1181  | 1180       | 28                    | 0.0237 | 10                   | 0.0085 | 18                              | 0.0153 | 1152      | 0.9763  |
| IKA    | 1842 | 1200  | 1198       | 25                    | 0.0209 | 18                   | 0.0150 | 7                               | 0.0058 | 1173      | 0.9791  |
| IKA    | 1843 | 1278  | 1275       | 39                    | 0.0306 | 20                   | 0.0157 | 19                              | 0.0149 | 1236      | 0.9694  |
| IKA    | 1844 | 1321  | 1317       | 16                    | 0.0121 | 10                   | 0.0076 | 6                               | 0.0046 | 1301      | 0.9879  |
| IKA    | 1845 | 1355  | 1350       | 27                    | 0.0200 | 12                   | 0.0089 | 15                              | 0.0111 | 1323      | 0.9800  |
| IKA    | 1846 | 1382  | 1377       | 22                    | 0.0160 | 11                   | 0.0080 | 11                              | 0.0080 | 1355      | 0.9840  |
| IKA    | 1847 | 1422  | 1418       | 31                    | 0.0219 | 16                   | 0.0113 | 15                              | 0.0106 | 1387      | 0.9781  |
| IKA    | 1848 | 1471  | 1466       | 36                    | 0.0246 | 19                   | 0.0130 | 17                              | 0.0116 | 1430      | 0.9754  |
| IKA    | 1849 | 1516  | 1512       | 38                    | 0.0251 | 18                   | 0.0119 | 20                              | 0.0132 | 1474      | 0.9749  |
| IKA    | 1850 | 1522  | 1516       | 46                    | 0.0303 | 23                   | 0.0152 | 23                              | 0.0152 | 1470      | 0.9697  |
| IKA    | 1851 | 1573  | 1565       | 29                    | 0.0185 | 14                   | 0.0089 | 15                              | 0.0096 | 1536      | 37.0000 |
| IKA    | 1852 | 1608  | 1597       | 46                    | 0.0288 | 28                   | 0.0175 | 18                              | 0.0113 | 1551      | 57.0000 |
| IKA    | 1853 | 1618  | 1612       | 37                    | 0.0230 | 22                   | 0.0136 | 15                              | 0.0093 | 1575      | 43.0000 |
| IKA    | 1854 | 1653  | 1647       | 32                    | 0.0194 | 17                   | 0.0103 | 15                              | 0.0091 | 1615      | 38.0000 |
| IKA    | 1855 | 1709  | 1703       | 28                    | 0.0164 | 16                   | 0.0094 | 12                              | 0.0070 | 1675      | 34.0000 |
| JAA    | 1751 | 31    | 31         | 0                     | 0.0000 | 0                    | 0.0000 | 0                               | 0.0000 | 31        | 1.0000  |
| JAA    | 1752 | 31    | 31         | 0                     | 0.0000 | 0                    | 0.0000 | 0                               | 0.0000 | 31        | 1.0000  |
| JAA    | 1753 | 31    | 31         | 0                     | 0.0000 | 0                    | 0.0000 | 0                               | 0.0000 | 31        | 1.0000  |
| JAA    | 1754 | 29    | 29         | 0                     | 0.0000 | 0                    | 0.0000 | 0                               | 0.0000 | 29        | 1.0000  |
| JAA    | 1755 | 25    | 25         | 0                     | 0.0000 | 0                    | 0.0000 | 0                               | 0.0000 | 25        | 1.0000  |
| JAA    | 1756 | 24    | 24         | 0                     | 0.0000 | 0                    | 0.0000 | 0                               | 0.0000 | 24        | 1.0000  |
| JAA    | 1757 | 24    | 24         | 0                     | 0.0000 | 0                    | 0.0000 | 0                               | 0.0000 | 24        | 1.0000  |
| JAA    | 1758 | 20    | 20         | 0                     | 0.0000 | 0                    | 0.0000 | 0                               | 0.0000 | 20        | 1.0000  |
| JAA    | 1759 | 15    | 15         | 0                     | 0.0000 | 0                    | 0.0000 | 0                               | 0.0000 | 15        | 1.0000  |
| JAA    | 1760 | 13    | 13         | 0                     | 0.0000 | 0                    | 0.0000 | 0                               | 0.0000 | 13        | 1.0000  |

| Parish | Year | Alive | Known fate | Deaths of known cause |        | Deaths of infections |        | Deaths of non-infectious causes |        | Survivors |        |
|--------|------|-------|------------|-----------------------|--------|----------------------|--------|---------------------------------|--------|-----------|--------|
|        |      |       |            | N                     | Prop   | N                    | Prop   | N                               | Prop   | N         | Prop   |
| JAA    | 1761 | 11    | 11         | 0                     | 0.0000 | 0                    | 0.0000 | 0                               | 0.0000 | 11        | 1.0000 |
| JAA    | 1762 | 7     | 7          | 0                     | 0.0000 | 0                    | 0.0000 | 0                               | 0.0000 | 7         | 1.0000 |
| JAA    | 1763 | 5     | 5          | 0                     | 0.0000 | 0                    | 0.0000 | 0                               | 0.0000 | 5         | 1.0000 |
| JAA    | 1764 | 5     | 5          | 0                     | 0.0000 | 0                    | 0.0000 | 0                               | 0.0000 | 5         | 1.0000 |
| JAA    | 1765 | 4     | 4          | 0                     | 0.0000 | 0                    | 0.0000 | 0                               | 0.0000 | 4         | 1.0000 |
| JAA    | 1766 | 5     | 5          | 0                     | 0.0000 | 0                    | 0.0000 | 0                               | 0.0000 | 5         | 1.0000 |
| JAA    | 1767 | 4     | 4          | 0                     | 0.0000 | 0                    | 0.0000 | 0                               | 0.0000 | 4         | 1.0000 |
| JAA    | 1768 | 6     | 6          | 0                     | 0.0000 | 0                    | 0.0000 | 0                               | 0.0000 | 6         | 1.0000 |
| JAA    | 1769 | 9     | 9          | 0                     | 0.0000 | 0                    | 0.0000 | 0                               | 0.0000 | 9         | 1.0000 |
| JAA    | 1770 | 9     | 9          | 0                     | 0.0000 | 0                    | 0.0000 | 0                               | 0.0000 | 9         | 1.0000 |
| JAA    | 1771 | 19    | 19         | 0                     | 0.0000 | 0                    | 0.0000 | 0                               | 0.0000 | 19        | 1.0000 |
| JAA    | 1772 | 30    | 30         | 8                     | 0.2667 | 7                    | 0.2333 | 1                               | 0.0333 | 22        | 0.7333 |
| JAA    | 1773 | 32    | 32         | 1                     | 0.0313 | 1                    | 0.0313 | 0                               | 0.0000 | 31        | 0.9688 |
| JAA    | 1774 | 43    | 43         | 3                     | 0.0698 | 3                    | 0.0698 | 0                               | 0.0000 | 40        | 0.9302 |
| JAA    | 1775 | 46    | 46         | 2                     | 0.0435 | 2                    | 0.0435 | 0                               | 0.0000 | 44        | 0.9565 |
| JAA    | 1776 | 53    | 52         | 2                     | 0.0385 | 2                    | 0.0385 | 0                               | 0.0000 | 50        | 0.9615 |
| JAA    | 1777 | 58    | 58         | 1                     | 0.0172 | 1                    | 0.0172 | 0                               | 0.0000 | 57        | 0.9828 |
| JAA    | 1778 | 64    | 63         | 1                     | 0.0159 | 1                    | 0.0159 | 0                               | 0.0000 | 62        | 0.9841 |
| JAA    | 1779 | 66    | 66         | 3                     | 0.0455 | 2                    | 0.0303 | 1                               | 0.0152 | 63        | 0.9545 |
| JAA    | 1780 | 66    | 66         | 1                     | 0.0152 | 0                    | 0.0000 | 1                               | 0.0152 | 65        | 0.9848 |
| JAA    | 1781 | 72    | 72         | 0                     | 0.0000 | 0                    | 0.0000 | 0                               | 0.0000 | 72        | 1.0000 |
| JAA    | 1782 | 68    | 68         | 2                     | 0.0294 | 1                    | 0.0147 | 1                               | 0.0147 | 66        | 0.9706 |
| JAA    | 1783 | 67    | 67         | 2                     | 0.0299 | 2                    | 0.0299 | 0                               | 0.0000 | 65        | 0.9701 |
| JAA    | 1784 | 67    | 67         | 0                     | 0.0000 | 0                    | 0.0000 | 0                               | 0.0000 | 67        | 1.0000 |
| JAA    | 1785 | 64    | 64         | 2                     | 0.0313 | 2                    | 0.0313 | 0                               | 0.0000 | 62        | 0.9688 |

| Parish | Year | Alive | Known fate | Deaths of known cause |        | Deaths of infections |        | Deaths of non-infectious causes |        | Survivors |        |
|--------|------|-------|------------|-----------------------|--------|----------------------|--------|---------------------------------|--------|-----------|--------|
|        |      |       |            | N                     | Prop   | N                    | Prop   | N                               | Prop   | N         | Prop   |
| JAA    | 1786 | 59    | 59         | 3                     | 0.0508 | 2                    | 0.0339 | 1                               | 0.0169 | 56        | 0.9492 |
| JAA    | 1787 | 63    | 63         | 0                     | 0.0000 | 0                    | 0.0000 | 0                               | 0.0000 | 63        | 1.0000 |
| JAA    | 1788 | 62    | 62         | 8                     | 0.1290 | 6                    | 0.0968 | 2                               | 0.0323 | 54        | 0.8710 |
| JAA    | 1789 | 54    | 54         | 5                     | 0.0926 | 4                    | 0.0741 | 1                               | 0.0185 | 49        | 0.9074 |
| JAA    | 1790 | 47    | 47         | 1                     | 0.0213 | 1                    | 0.0213 | 0                               | 0.0000 | 46        | 0.9787 |
| JAA    | 1791 | 44    | 44         | 1                     | 0.0227 | 1                    | 0.0227 | 0                               | 0.0000 | 43        | 0.9773 |
| JAA    | 1792 | 40    | 39         | 1                     | 0.0256 | 1                    | 0.0256 | 0                               | 0.0000 | 38        | 0.9744 |
| JAA    | 1793 | 44    | 44         | 1                     | 0.0227 | 0                    | 0.0000 | 1                               | 0.0227 | 43        | 0.9773 |
| JAA    | 1794 | 42    | 42         | 6                     | 0.1429 | 6                    | 0.1429 | 0                               | 0.0000 | 36        | 0.8571 |
| JAA    | 1795 | 39    | 39         | 1                     | 0.0256 | 1                    | 0.0256 | 0                               | 0.0000 | 38        | 0.9744 |
| JAA    | 1796 | 43    | 43         | 3                     | 0.0698 | 3                    | 0.0698 | 0                               | 0.0000 | 40        | 0.9302 |
| JAA    | 1797 | 44    | 44         | 1                     | 0.0227 | 1                    | 0.0227 | 0                               | 0.0000 | 43        | 0.9773 |
| JAA    | 1798 | 52    | 52         | 1                     | 0.0192 | 0                    | 0.0000 | 1                               | 0.0192 | 51        | 0.9808 |
| JAA    | 1799 | 54    | 54         | 1                     | 0.0185 | 0                    | 0.0000 | 1                               | 0.0185 | 53        | 0.9815 |
| JAA    | 1800 | 58    | 58         | 0                     | 0.0000 | 0                    | 0.0000 | 0                               | 0.0000 | 58        | 1.0000 |
| JAA    | 1801 | 71    | 71         | 4                     | 0.0563 | 3                    | 0.0423 | 1                               | 0.0141 | 67        | 0.9437 |
| JAA    | 1802 | 76    | 76         | 3                     | 0.0395 | 3                    | 0.0395 | 0                               | 0.0000 | 73        | 0.9605 |
| JAA    | 1803 | 84    | 84         | 3                     | 0.0357 | 2                    | 0.0238 | 1                               | 0.0119 | 81        | 0.9643 |
| JAA    | 1804 | 84    | 84         | 2                     | 0.0238 | 2                    | 0.0238 | 0                               | 0.0000 | 82        | 0.9762 |
| JAA    | 1805 | 87    | 87         | 3                     | 0.0345 | 2                    | 0.0230 | 1                               | 0.0115 | 84        | 0.9655 |
| JAA    | 1806 | 92    | 92         | 3                     | 0.0326 | 2                    | 0.0217 | 1                               | 0.0109 | 89        | 0.9674 |
| JAA    | 1807 | 89    | 89         | 2                     | 0.0225 | 2                    | 0.0225 | 0                               | 0.0000 | 87        | 0.9775 |
| JAA    | 1808 | 98    | 98         | 2                     | 0.0204 | 2                    | 0.0204 | 0                               | 0.0000 | 96        | 0.9796 |
| JAA    | 1809 | 94    | 94         | 7                     | 0.0745 | 7                    | 0.0745 | 0                               | 0.0000 | 87        | 0.9255 |
| JAA    | 1810 | 88    | 88         | 1                     | 0.0114 | 1                    | 0.0114 | 0                               | 0.0000 | 87        | 0.9886 |

| Parish | Year | Alive | Known fate | Deaths of known cause |        | Deaths of infections |        | Deaths of non-infectious causes |        | Survivors |        |
|--------|------|-------|------------|-----------------------|--------|----------------------|--------|---------------------------------|--------|-----------|--------|
|        |      |       |            | N                     | Prop   | N                    | Prop   | N                               | Prop   | N         | Prop   |
| JAA    | 1811 | 91    | 91         | 2                     | 0.0220 | 2                    | 0.0220 | 0                               | 0.0000 | 89        | 0.9780 |
| JAA    | 1812 | 97    | 96         | 5                     | 0.0521 | 4                    | 0.0417 | 1                               | 0.0104 | 91        | 0.9479 |
| JAA    | 1813 | 106   | 106        | 7                     | 0.0660 | 5                    | 0.0472 | 2                               | 0.0189 | 99        | 0.9340 |
| JAA    | 1814 | 101   | 101        | 1                     | 0.0099 | 1                    | 0.0099 | 0                               | 0.0000 | 100       | 0.9901 |
| JAA    | 1815 | 110   | 110        | 5                     | 0.0455 | 5                    | 0.0455 | 0                               | 0.0000 | 105       | 0.9545 |
| JAA    | 1816 | 112   | 112        | 5                     | 0.0446 | 5                    | 0.0446 | 0                               | 0.0000 | 107       | 0.9554 |
| JAA    | 1817 | 111   | 111        | 3                     | 0.0270 | 3                    | 0.0270 | 0                               | 0.0000 | 108       | 0.9730 |
| JAA    | 1818 | 118   | 118        | 5                     | 0.0424 | 4                    | 0.0339 | 1                               | 0.0085 | 113       | 0.9576 |
| JAA    | 1819 | 109   | 109        | 1                     | 0.0092 | 1                    | 0.0092 | 0                               | 0.0000 | 108       | 0.9908 |
| JAA    | 1820 | 113   | 113        | 1                     | 0.0088 | 1                    | 0.0088 | 0                               | 0.0000 | 112       | 0.9912 |
| JAA    | 1821 | 121   | 121        | 6                     | 0.0496 | 5                    | 0.0413 | 1                               | 0.0083 | 115       | 0.9504 |
| JAA    | 1822 | 124   | 124        | 5                     | 0.0403 | 5                    | 0.0403 | 0                               | 0.0000 | 119       | 0.9597 |
| JAA    | 1823 | 120   | 120        | 2                     | 0.0167 | 2                    | 0.0167 | 0                               | 0.0000 | 118       | 0.9833 |
| JAA    | 1824 | 119   | 119        | 14                    | 0.1176 | 14                   | 0.1176 | 0                               | 0.0000 | 105       | 0.8824 |
| JAA    | 1825 | 113   | 113        | 4                     | 0.0354 | 4                    | 0.0354 | 0                               | 0.0000 | 109       | 0.9646 |
| JAA    | 1826 | 110   | 110        | 6                     | 0.0545 | 6                    | 0.0545 | 0                               | 0.0000 | 104       | 0.9455 |
| JAA    | 1827 | 104   | 104        | 2                     | 0.0192 | 2                    | 0.0192 | 0                               | 0.0000 | 102       | 0.9808 |
| JAA    | 1828 | 107   | 107        | 1                     | 0.0093 | 1                    | 0.0093 | 0                               | 0.0000 | 106       | 0.9907 |
| JAA    | 1829 | 117   | 117        | 9                     | 0.0769 | 9                    | 0.0769 | 0                               | 0.0000 | 108       | 0.9231 |
| JAA    | 1830 | 122   | 122        | 2                     | 0.0164 | 1                    | 0.0082 | 1                               | 0.0082 | 120       | 0.9836 |
| JAA    | 1831 | 127   | 127        | 2                     | 0.0157 | 1                    | 0.0079 | 1                               | 0.0079 | 125       | 0.9843 |
| JAA    | 1832 | 136   | 136        | 6                     | 0.0441 | 6                    | 0.0441 | 0                               | 0.0000 | 130       | 0.9559 |
| JAA    | 1833 | 124   | 124        | 5                     | 0.0403 | 5                    | 0.0403 | 0                               | 0.0000 | 119       | 0.9597 |
| JAA    | 1834 | 132   | 132        | 3                     | 0.0227 | 3                    | 0.0227 | 0                               | 0.0000 | 129       | 0.9773 |
| JAA    | 1835 | 133   | 133        | 3                     | 0.0226 | 3                    | 0.0226 | 0                               | 0.0000 | 130       | 0.9774 |

| Parish | Year | Alive | Known fate | Deaths of known cause |        | Deaths of infections |        | Deaths of non-infectious causes |        | Survivors |         |
|--------|------|-------|------------|-----------------------|--------|----------------------|--------|---------------------------------|--------|-----------|---------|
|        |      |       |            | N                     | Prop   | N                    | Prop   | N                               | Prop   | N         | Prop    |
| JAA    | 1836 | 129   | 129        | 5                     | 0.0388 | 5                    | 0.0388 | 0                               | 0.0000 | 124       | 0.9612  |
| JAA    | 1837 | 127   | 127        | 5                     | 0.0394 | 4                    | 0.0315 | 1                               | 0.0079 | 122       | 0.9606  |
| JAA    | 1838 | 129   | 129        | 1                     | 0.0078 | 1                    | 0.0078 | 0                               | 0.0000 | 128       | 0.9922  |
| JAA    | 1839 | 141   | 141        | 6                     | 0.0426 | 5                    | 0.0355 | 1                               | 0.0071 | 135       | 0.9574  |
| JAA    | 1840 | 145   | 145        | 3                     | 0.0207 | 3                    | 0.0207 | 0                               | 0.0000 | 142       | 0.9793  |
| JAA    | 1841 | 152   | 152        | 2                     | 0.0132 | 2                    | 0.0132 | 0                               | 0.0000 | 150       | 0.9868  |
| JAA    | 1842 | 162   | 162        | 9                     | 0.0556 | 9                    | 0.0556 | 0                               | 0.0000 | 153       | 0.9444  |
| JAA    | 1843 | 174   | 174        | 8                     | 0.0460 | 8                    | 0.0460 | 0                               | 0.0000 | 166       | 0.9540  |
| JAA    | 1844 | 178   | 178        | 10                    | 0.0562 | 7                    | 0.0393 | 3                               | 0.0169 | 168       | 0.9438  |
| JAA    | 1845 | 185   | 185        | 5                     | 0.0270 | 2                    | 0.0108 | 3                               | 0.0162 | 180       | 0.9730  |
| JAA    | 1846 | 190   | 190        | 8                     | 0.0421 | 5                    | 0.0263 | 3                               | 0.0158 | 182       | 0.9579  |
| JAA    | 1847 | 196   | 196        | 5                     | 0.0255 | 4                    | 0.0204 | 1                               | 0.0051 | 191       | 0.9745  |
| JAA    | 1848 | 206   | 206        | 9                     | 0.0437 | 8                    | 0.0388 | 1                               | 0.0049 | 197       | 0.9563  |
| JAA    | 1849 | 209   | 209        | 5                     | 0.0239 | 4                    | 0.0191 | 1                               | 0.0048 | 204       | 0.9761  |
| JAA    | 1850 | 205   | 205        | 5                     | 0.0244 | 4                    | 0.0195 | 1                               | 0.0049 | 200       | 0.9756  |
| JAA    | 1851 | 210   | 210        | 3                     | 0.0143 | 3                    | 0.0143 | 0                               | 0.0000 | 207       | 3.0000  |
| JAA    | 1852 | 208   | 208        | 2                     | 0.0096 | 1                    | 0.0048 | 1                               | 0.0048 | 206       | 2.0000  |
| JAA    | 1853 | 219   | 219        | 13                    | 0.0594 | 8                    | 0.0365 | 5                               | 0.0228 | 206       | 13.0000 |
| JAA    | 1854 | 213   | 213        | 5                     | 0.0235 | 4                    | 0.0188 | 1                               | 0.0047 | 208       | 5.0000  |
| JAA    | 1855 | 215   | 215        | 11                    | 0.0512 | 8                    | 0.0372 | 3                               | 0.0140 | 204       | 11.0000 |
| KUS    | 1751 | 34    | 34         | 0                     | 0.0000 | 0                    | 0.0000 | 0                               | 0.0000 | 34        | 1.0000  |
| KUS    | 1752 | 38    | 38         | 0                     | 0.0000 | 0                    | 0.0000 | 0                               | 0.0000 | 38        | 1.0000  |
| KUS    | 1753 | 34    | 34         | 0                     | 0.0000 | 0                    | 0.0000 | 0                               | 0.0000 | 34        | 1.0000  |
| KUS    | 1754 | 31    | 31         | 0                     | 0.0000 | 0                    | 0.0000 | 0                               | 0.0000 | 31        | 1.0000  |
| KUS    | 1755 | 29    | 29         | 0                     | 0.0000 | 0                    | 0.0000 | 0                               | 0.0000 | 29        | 1.0000  |



| Parish | Year | Alive | Known fate | Deaths of known cause |        | Deaths of infections |        | Deaths of non-infectious causes |        | Survivors |        |
|--------|------|-------|------------|-----------------------|--------|----------------------|--------|---------------------------------|--------|-----------|--------|
|        |      |       |            | N                     | Prop   | N                    | Prop   | N                               | Prop   | N         | Prop   |
| KUS    | 1756 | 27    | 27         | 0                     | 0.0000 | 0                    | 0.0000 | 0                               | 0.0000 | 27        | 1.0000 |
| KUS    | 1757 | 27    | 27         | 0                     | 0.0000 | 0                    | 0.0000 | 0                               | 0.0000 | 27        | 1.0000 |
| KUS    | 1758 | 27    | 27         | 0                     | 0.0000 | 0                    | 0.0000 | 0                               | 0.0000 | 27        | 1.0000 |
| KUS    | 1759 | 29    | 29         | 0                     | 0.0000 | 0                    | 0.0000 | 0                               | 0.0000 | 29        | 1.0000 |
| KUS    | 1760 | 33    | 33         | 0                     | 0.0000 | 0                    | 0.0000 | 0                               | 0.0000 | 33        | 1.0000 |
| KUS    | 1761 | 37    | 37         | 0                     | 0.0000 | 0                    | 0.0000 | 0                               | 0.0000 | 37        | 1.0000 |
| KUS    | 1762 | 32    | 32         | 0                     | 0.0000 | 0                    | 0.0000 | 0                               | 0.0000 | 32        | 1.0000 |
| KUS    | 1763 | 34    | 34         | 0                     | 0.0000 | 0                    | 0.0000 | 0                               | 0.0000 | 34        | 1.0000 |
| KUS    | 1764 | 33    | 33         | 1                     | 0.0303 | 0                    | 0.0000 | 1                               | 0.0303 | 32        | 0.9697 |
| KUS    | 1765 | 42    | 42         | 0                     | 0.0000 | 0                    | 0.0000 | 0                               | 0.0000 | 42        | 1.0000 |
| KUS    | 1766 | 47    | 47         | 2                     | 0.0426 | 1                    | 0.0213 | 1                               | 0.0213 | 45        | 0.9574 |
| KUS    | 1767 | 53    | 53         | 1                     | 0.0189 | 0                    | 0.0000 | 1                               | 0.0189 | 52        | 0.9811 |
| KUS    | 1768 | 56    | 56         | 0                     | 0.0000 | 0                    | 0.0000 | 0                               | 0.0000 | 56        | 1.0000 |
| KUS    | 1769 | 61    | 60         | 1                     | 0.0167 | 0                    | 0.0000 | 1                               | 0.0167 | 59        | 0.9833 |
| KUS    | 1770 | 59    | 58         | 1                     | 0.0172 | 1                    | 0.0172 | 0                               | 0.0000 | 57        | 0.9828 |
| KUS    | 1771 | 56    | 56         | 1                     | 0.0179 | 1                    | 0.0179 | 0                               | 0.0000 | 55        | 0.9821 |
| KUS    | 1772 | 69    | 69         | 2                     | 0.0290 | 2                    | 0.0290 | 0                               | 0.0000 | 67        | 0.9710 |
| KUS    | 1773 | 72    | 72         | 0                     | 0.0000 | 0                    | 0.0000 | 0                               | 0.0000 | 72        | 1.0000 |
| KUS    | 1774 | 82    | 82         | 1                     | 0.0122 | 1                    | 0.0122 | 0                               | 0.0000 | 81        | 0.9878 |
| KUS    | 1775 | 93    | 93         | 2                     | 0.0215 | 2                    | 0.0215 | 0                               | 0.0000 | 91        | 0.9785 |
| KUS    | 1776 | 93    | 93         | 2                     | 0.0215 | 2                    | 0.0215 | 0                               | 0.0000 | 91        | 0.9785 |
| KUS    | 1777 | 90    | 90         | 1                     | 0.0111 | 1                    | 0.0111 | 0                               | 0.0000 | 89        | 0.9889 |
| KUS    | 1778 | 94    | 94         | 5                     | 0.0532 | 3                    | 0.0319 | 2                               | 0.0213 | 89        | 0.9468 |
| KUS    | 1779 | 97    | 97         | 1                     | 0.0103 | 1                    | 0.0103 | 0                               | 0.0000 | 96        | 0.9897 |
| KUS    | 1780 | 107   | 107        | 1                     | 0.0093 | 1                    | 0.0093 | 0                               | 0.0000 | 106       | 0.9907 |

| Parish | Year | Alive | Known fate | Deaths of known cause |        | Deaths of infections |        | Deaths of non-infectious causes |        | Survivors |        |
|--------|------|-------|------------|-----------------------|--------|----------------------|--------|---------------------------------|--------|-----------|--------|
|        |      |       |            | N                     | Prop   | N                    | Prop   | N                               | Prop   | N         | Prop   |
| KUS    | 1781 | 117   | 115        | 0                     | 0.0000 | 0                    | 0.0000 | 0                               | 0.0000 | 115       | 1.0000 |
| KUS    | 1782 | 124   | 122        | 0                     | 0.0000 | 0                    | 0.0000 | 0                               | 0.0000 | 122       | 1.0000 |
| KUS    | 1783 | 123   | 123        | 3                     | 0.0244 | 3                    | 0.0244 | 0                               | 0.0000 | 120       | 0.9756 |
| KUS    | 1784 | 126   | 126        | 1                     | 0.0079 | 1                    | 0.0079 | 0                               | 0.0000 | 125       | 0.9921 |
| KUS    | 1785 | 121   | 120        | 1                     | 0.0083 | 1                    | 0.0083 | 0                               | 0.0000 | 119       | 0.9917 |
| KUS    | 1786 | 124   | 124        | 0                     | 0.0000 | 0                    | 0.0000 | 0                               | 0.0000 | 124       | 1.0000 |
| KUS    | 1787 | 134   | 134        | 1                     | 0.0075 | 1                    | 0.0075 | 0                               | 0.0000 | 133       | 0.9925 |
| KUS    | 1788 | 136   | 136        | 1                     | 0.0074 | 1                    | 0.0074 | 0                               | 0.0000 | 135       | 0.9926 |
| KUS    | 1789 | 140   | 140        | 1                     | 0.0071 | 1                    | 0.0071 | 0                               | 0.0000 | 139       | 0.9929 |
| KUS    | 1790 | 139   | 139        | 0                     | 0.0000 | 0                    | 0.0000 | 0                               | 0.0000 | 139       | 1.0000 |
| KUS    | 1791 | 141   | 141        | 0                     | 0.0000 | 0                    | 0.0000 | 0                               | 0.0000 | 141       | 1.0000 |
| KUS    | 1792 | 146   | 146        | 1                     | 0.0068 | 1                    | 0.0068 | 0                               | 0.0000 | 145       | 0.9932 |
| KUS    | 1793 | 158   | 158        | 2                     | 0.0127 | 2                    | 0.0127 | 0                               | 0.0000 | 156       | 0.9873 |
| KUS    | 1794 | 156   | 155        | 3                     | 0.0194 | 3                    | 0.0194 | 0                               | 0.0000 | 152       | 0.9806 |
| KUS    | 1795 | 164   | 162        | 2                     | 0.0123 | 2                    | 0.0123 | 0                               | 0.0000 | 160       | 0.9877 |
| KUS    | 1796 | 168   | 166        | 3                     | 0.0181 | 3                    | 0.0181 | 0                               | 0.0000 | 163       | 0.9819 |
| KUS    | 1797 | 167   | 167        | 4                     | 0.0240 | 4                    | 0.0240 | 0                               | 0.0000 | 163       | 0.9760 |
| KUS    | 1798 | 160   | 160        | 2                     | 0.0125 | 1                    | 0.0063 | 1                               | 0.0063 | 158       | 0.9875 |
| KUS    | 1799 | 162   | 162        | 1                     | 0.0062 | 1                    | 0.0062 | 0                               | 0.0000 | 161       | 0.9938 |
| KUS    | 1800 | 167   | 167        | 1                     | 0.0060 | 1                    | 0.0060 | 0                               | 0.0000 | 166       | 0.9940 |
| KUS    | 1801 | 167   | 167        | 0                     | 0.0000 | 0                    | 0.0000 | 0                               | 0.0000 | 167       | 1.0000 |
| KUS    | 1802 | 184   | 184        | 1                     | 0.0054 | 1                    | 0.0054 | 0                               | 0.0000 | 183       | 0.9946 |
| KUS    | 1803 | 190   | 190        | 2                     | 0.0105 | 2                    | 0.0105 | 0                               | 0.0000 | 188       | 0.9895 |
| KUS    | 1804 | 192   | 192        | 1                     | 0.0052 | 1                    | 0.0052 | 0                               | 0.0000 | 191       | 0.9948 |
| KUS    | 1805 | 198   | 198        | 2                     | 0.0101 | 2                    | 0.0101 | 0                               | 0.0000 | 196       | 0.9899 |

| Parish | Year | Alive | Known fate | Deaths of known cause |        | Deaths of infections |        | Deaths of non-infectious causes |        | Survivors |        |
|--------|------|-------|------------|-----------------------|--------|----------------------|--------|---------------------------------|--------|-----------|--------|
|        |      |       |            | N                     | Prop   | N                    | Prop   | N                               | Prop   | N         | Prop   |
| KUS    | 1806 | 201   | 201        | 5                     | 0.0249 | 4                    | 0.0199 | 1                               | 0.0050 | 196       | 0.9751 |
| KUS    | 1807 | 209   | 209        | 2                     | 0.0096 | 2                    | 0.0096 | 0                               | 0.0000 | 207       | 0.9904 |
| KUS    | 1808 | 214   | 214        | 4                     | 0.0187 | 4                    | 0.0187 | 0                               | 0.0000 | 210       | 0.9813 |
| KUS    | 1809 | 217   | 217        | 0                     | 0.0000 | 0                    | 0.0000 | 0                               | 0.0000 | 217       | 1.0000 |
| KUS    | 1810 | 238   | 236        | 3                     | 0.0127 | 3                    | 0.0127 | 0                               | 0.0000 | 233       | 0.9873 |
| KUS    | 1811 | 228   | 226        | 3                     | 0.0133 | 1                    | 0.0044 | 2                               | 0.0088 | 223       | 0.9867 |
| KUS    | 1812 | 230   | 230        | 1                     | 0.0043 | 1                    | 0.0043 | 0                               | 0.0000 | 229       | 0.9957 |
| KUS    | 1813 | 223   | 223        | 1                     | 0.0045 | 1                    | 0.0045 | 0                               | 0.0000 | 222       | 0.9955 |
| KUS    | 1814 | 227   | 227        | 16                    | 0.0705 | 13                   | 0.0573 | 3                               | 0.0132 | 211       | 0.9295 |
| KUS    | 1815 | 223   | 221        | 0                     | 0.0000 | 0                    | 0.0000 | 0                               | 0.0000 | 221       | 1.0000 |
| KUS    | 1816 | 229   | 228        | 7                     | 0.0307 | 4                    | 0.0175 | 3                               | 0.0132 | 221       | 0.9693 |
| KUS    | 1817 | 233   | 233        | 9                     | 0.0386 | 8                    | 0.0343 | 1                               | 0.0043 | 224       | 0.9614 |
| KUS    | 1818 | 231   | 228        | 5                     | 0.0219 | 5                    | 0.0219 | 0                               | 0.0000 | 223       | 0.9781 |
| KUS    | 1819 | 231   | 230        | 8                     | 0.0348 | 5                    | 0.0217 | 3                               | 0.0130 | 222       | 0.9652 |
| KUS    | 1820 | 236   | 234        | 6                     | 0.0256 | 5                    | 0.0214 | 1                               | 0.0043 | 228       | 0.9744 |
| KUS    | 1821 | 252   | 249        | 2                     | 0.0080 | 1                    | 0.0040 | 1                               | 0.0040 | 247       | 0.9920 |
| KUS    | 1822 | 277   | 277        | 13                    | 0.0469 | 10                   | 0.0361 | 3                               | 0.0108 | 264       | 0.9531 |
| KUS    | 1823 | 280   | 278        | 3                     | 0.0108 | 3                    | 0.0108 | 0                               | 0.0000 | 275       | 0.9892 |
| KUS    | 1824 | 287   | 285        | 4                     | 0.0140 | 4                    | 0.0140 | 0                               | 0.0000 | 281       | 0.9860 |
| KUS    | 1825 | 305   | 305        | 4                     | 0.0131 | 3                    | 0.0098 | 1                               | 0.0033 | 301       | 0.9869 |
| KUS    | 1826 | 318   | 318        | 3                     | 0.0094 | 1                    | 0.0031 | 2                               | 0.0063 | 315       | 0.9906 |
| KUS    | 1827 | 327   | 324        | 4                     | 0.0123 | 3                    | 0.0093 | 1                               | 0.0031 | 320       | 0.9877 |
| KUS    | 1828 | 335   | 334        | 0                     | 0.0000 | 0                    | 0.0000 | 0                               | 0.0000 | 334       | 1.0000 |
| KUS    | 1829 | 344   | 342        | 6                     | 0.0175 | 4                    | 0.0117 | 2                               | 0.0058 | 336       | 0.9825 |
| KUS    | 1830 | 348   | 348        | 6                     | 0.0172 | 6                    | 0.0172 | 0                               | 0.0000 | 342       | 0.9828 |

| Parish | Year | Alive | Known fate | Deaths of known cause |        | Deaths of infections |        | Deaths of non-infectious causes |        | Survivors |         |
|--------|------|-------|------------|-----------------------|--------|----------------------|--------|---------------------------------|--------|-----------|---------|
|        |      |       |            | N                     | Prop   | N                    | Prop   | N                               | Prop   | N         | Prop    |
| KUS    | 1831 | 372   | 371        | 9                     | 0.0243 | 9                    | 0.0243 | 0                               | 0.0000 | 362       | 0.9757  |
| KUS    | 1832 | 350   | 350        | 2                     | 0.0057 | 0                    | 0.0000 | 2                               | 0.0057 | 348       | 0.9943  |
| KUS    | 1833 | 350   | 343        | 4                     | 0.0117 | 3                    | 0.0087 | 1                               | 0.0029 | 339       | 0.9883  |
| KUS    | 1834 | 365   | 363        | 11                    | 0.0303 | 10                   | 0.0275 | 1                               | 0.0028 | 352       | 0.9697  |
| KUS    | 1835 | 368   | 364        | 14                    | 0.0385 | 10                   | 0.0275 | 4                               | 0.0110 | 350       | 0.9615  |
| KUS    | 1836 | 357   | 355        | 4                     | 0.0113 | 4                    | 0.0113 | 0                               | 0.0000 | 351       | 0.9887  |
| KUS    | 1837 | 355   | 352        | 5                     | 0.0142 | 3                    | 0.0085 | 2                               | 0.0057 | 347       | 0.9858  |
| KUS    | 1838 | 369   | 368        | 2                     | 0.0054 | 1                    | 0.0027 | 1                               | 0.0027 | 366       | 0.9946  |
| KUS    | 1839 | 373   | 370        | 4                     | 0.0108 | 4                    | 0.0108 | 0                               | 0.0000 | 366       | 0.9892  |
| KUS    | 1840 | 383   | 381        | 6                     | 0.0157 | 6                    | 0.0157 | 0                               | 0.0000 | 375       | 0.9843  |
| KUS    | 1841 | 397   | 393        | 5                     | 0.0127 | 2                    | 0.0051 | 3                               | 0.0076 | 388       | 0.9873  |
| KUS    | 1842 | 392   | 391        | 0                     | 0.0000 | 0                    | 0.0000 | 0                               | 0.0000 | 391       | 1.0000  |
| KUS    | 1843 | 412   | 408        | 4                     | 0.0098 | 4                    | 0.0098 | 0                               | 0.0000 | 404       | 0.9902  |
| KUS    | 1844 | 416   | 413        | 6                     | 0.0145 | 4                    | 0.0097 | 2                               | 0.0048 | 407       | 0.9855  |
| KUS    | 1845 | 413   | 408        | 4                     | 0.0098 | 4                    | 0.0098 | 0                               | 0.0000 | 404       | 0.9902  |
| KUS    | 1846 | 417   | 416        | 5                     | 0.0120 | 4                    | 0.0096 | 1                               | 0.0024 | 411       | 0.9880  |
| KUS    | 1847 | 426   | 420        | 11                    | 0.0262 | 10                   | 0.0238 | 1                               | 0.0024 | 409       | 0.9738  |
| KUS    | 1848 | 426   | 423        | 8                     | 0.0189 | 6                    | 0.0142 | 2                               | 0.0047 | 415       | 0.9811  |
| KUS    | 1849 | 425   | 424        | 4                     | 0.0094 | 3                    | 0.0071 | 1                               | 0.0024 | 420       | 0.9906  |
| KUS    | 1850 | 429   | 426        | 2                     | 0.0047 | 2                    | 0.0047 | 0                               | 0.0000 | 424       | 0.9953  |
| KUS    | 1851 | 432   | 431        | 7                     | 0.0162 | 7                    | 0.0162 | 0                               | 0.0000 | 424       | 8.0000  |
| KUS    | 1852 | 443   | 442        | 1                     | 0.0023 | 1                    | 0.0023 | 0                               | 0.0000 | 441       | 2.0000  |
| KUS    | 1853 | 447   | 439        | 13                    | 0.0296 | 11                   | 0.0251 | 2                               | 0.0046 | 426       | 21.0000 |
| KUS    | 1854 | 442   | 437        | 4                     | 0.0092 | 2                    | 0.0046 | 2                               | 0.0046 | 433       | 9.0000  |
| KUS    | 1855 | 464   | 456        | 5                     | 0.0110 | 5                    | 0.0110 | 0                               | 0.0000 | 451       | 13.0000 |

| Parish | Year | Alive | Known fate | Deaths of known cause |        | Deaths of infections |        | Deaths of non-infectious causes |        | Survivors |        |
|--------|------|-------|------------|-----------------------|--------|----------------------|--------|---------------------------------|--------|-----------|--------|
|        |      |       |            | N                     | Prop   | N                    | Prop   | N                               | Prop   | N         | Prop   |
| PUL    | 1751 | 107   | 107        | 3                     | 0.0280 | 0                    | 0.0000 | 3                               | 0.0280 | 104       | 0.9720 |
| PUL    | 1752 | 111   | 111        | 2                     | 0.0180 | 0                    | 0.0000 | 2                               | 0.0180 | 109       | 0.9820 |
| PUL    | 1753 | 131   | 131        | 4                     | 0.0305 | 2                    | 0.0153 | 2                               | 0.0153 | 127       | 0.9695 |
| PUL    | 1754 | 132   | 132        | 7                     | 0.0530 | 0                    | 0.0000 | 7                               | 0.0530 | 125       | 0.9470 |
| PUL    | 1755 | 136   | 136        | 3                     | 0.0221 | 0                    | 0.0000 | 3                               | 0.0221 | 133       | 0.9779 |
| PUL    | 1756 | 152   | 151        | 9                     | 0.0596 | 7                    | 0.0464 | 2                               | 0.0132 | 142       | 0.9404 |
| PUL    | 1757 | 164   | 164        | 7                     | 0.0427 | 2                    | 0.0122 | 5                               | 0.0305 | 157       | 0.9573 |
| PUL    | 1758 | 166   | 166        | 3                     | 0.0181 | 1                    | 0.0060 | 2                               | 0.0120 | 163       | 0.9819 |
| PUL    | 1759 | 173   | 173        | 3                     | 0.0173 | 2                    | 0.0116 | 1                               | 0.0058 | 170       | 0.9827 |
| PUL    | 1760 | 180   | 180        | 4                     | 0.0222 | 0                    | 0.0000 | 4                               | 0.0222 | 176       | 0.9778 |
| PUL    | 1761 | 192   | 192        | 2                     | 0.0104 | 1                    | 0.0052 | 1                               | 0.0052 | 190       | 0.9896 |
| PUL    | 1762 | 191   | 191        | 4                     | 0.0209 | 0                    | 0.0000 | 4                               | 0.0209 | 187       | 0.9791 |
| PUL    | 1763 | 202   | 201        | 9                     | 0.0448 | 6                    | 0.0299 | 3                               | 0.0149 | 192       | 0.9552 |
| PUL    | 1764 | 195   | 195        | 3                     | 0.0154 | 0                    | 0.0000 | 3                               | 0.0154 | 192       | 0.9846 |
| PUL    | 1765 | 201   | 200        | 4                     | 0.0200 | 1                    | 0.0050 | 3                               | 0.0150 | 196       | 0.9800 |
| PUL    | 1766 | 211   | 211        | 4                     | 0.0190 | 1                    | 0.0047 | 3                               | 0.0142 | 207       | 0.9810 |
| PUL    | 1767 | 208   | 208        | 1                     | 0.0048 | 0                    | 0.0000 | 1                               | 0.0048 | 207       | 0.9952 |
| PUL    | 1768 | 207   | 207        | 0                     | 0.0000 | 0                    | 0.0000 | 0                               | 0.0000 | 207       | 1.0000 |
| PUL    | 1769 | 215   | 214        | 11                    | 0.0514 | 8                    | 0.0374 | 3                               | 0.0140 | 203       | 0.9486 |
| PUL    | 1770 | 214   | 214        | 2                     | 0.0093 | 1                    | 0.0047 | 1                               | 0.0047 | 212       | 0.9907 |
| PUL    | 1771 | 220   | 220        | 4                     | 0.0182 | 1                    | 0.0045 | 3                               | 0.0136 | 216       | 0.9818 |
| PUL    | 1772 | 223   | 222        | 5                     | 0.0225 | 2                    | 0.0090 | 3                               | 0.0135 | 217       | 0.9775 |
| PUL    | 1773 | 231   | 231        | 2                     | 0.0087 | 0                    | 0.0000 | 2                               | 0.0087 | 229       | 0.9913 |
| PUL    | 1774 | 233   | 233        | 1                     | 0.0043 | 0                    | 0.0000 | 1                               | 0.0043 | 232       | 0.9957 |
| PUL    | 1775 | 234   | 233        | 1                     | 0.0043 | 0                    | 0.0000 | 1                               | 0.0043 | 232       | 0.9957 |

| Parish | Year | Alive | Known fate | Deaths of known cause |        | Deaths of infections |        | Deaths of non-infectious causes |        | Survivors |        |
|--------|------|-------|------------|-----------------------|--------|----------------------|--------|---------------------------------|--------|-----------|--------|
|        |      |       |            | N                     | Prop   | N                    | Prop   | N                               | Prop   | N         | Prop   |
| PUL    | 1776 | 251   | 248        | 1                     | 0.0040 | 0                    | 0.0000 | 1                               | 0.0040 | 247       | 0.9960 |
| PUL    | 1777 | 256   | 255        | 5                     | 0.0196 | 3                    | 0.0118 | 2                               | 0.0078 | 250       | 0.9804 |
| PUL    | 1778 | 264   | 261        | 10                    | 0.0383 | 7                    | 0.0268 | 3                               | 0.0115 | 251       | 0.9617 |
| PUL    | 1779 | 286   | 285        | 3                     | 0.0105 | 0                    | 0.0000 | 3                               | 0.0105 | 282       | 0.9895 |
| PUL    | 1780 | 294   | 293        | 7                     | 0.0239 | 5                    | 0.0171 | 2                               | 0.0068 | 286       | 0.9761 |
| PUL    | 1781 | 304   | 302        | 5                     | 0.0166 | 0                    | 0.0000 | 5                               | 0.0166 | 297       | 0.9834 |
| PUL    | 1782 | 321   | 319        | 3                     | 0.0094 | 2                    | 0.0063 | 1                               | 0.0031 | 316       | 0.9906 |
| PUL    | 1783 | 333   | 327        | 6                     | 0.0183 | 3                    | 0.0092 | 3                               | 0.0092 | 321       | 0.9817 |
| PUL    | 1784 | 349   | 344        | 14                    | 0.0407 | 11                   | 0.0320 | 3                               | 0.0087 | 330       | 0.9593 |
| PUL    | 1785 | 342   | 342        | 11                    | 0.0322 | 5                    | 0.0146 | 6                               | 0.0175 | 331       | 0.9678 |
| PUL    | 1786 | 350   | 348        | 3                     | 0.0086 | 1                    | 0.0029 | 2                               | 0.0057 | 345       | 0.9914 |
| PUL    | 1787 | 371   | 365        | 1                     | 0.0027 | 0                    | 0.0000 | 1                               | 0.0027 | 364       | 0.9973 |
| PUL    | 1788 | 376   | 373        | 3                     | 0.0080 | 2                    | 0.0054 | 1                               | 0.0027 | 370       | 0.9920 |
| PUL    | 1789 | 380   | 377        | 13                    | 0.0345 | 9                    | 0.0239 | 4                               | 0.0106 | 364       | 0.9655 |
| PUL    | 1790 | 367   | 363        | 9                     | 0.0248 | 4                    | 0.0110 | 5                               | 0.0138 | 354       | 0.9752 |
| PUL    | 1791 | 356   | 351        | 5                     | 0.0142 | 4                    | 0.0114 | 1                               | 0.0028 | 346       | 0.9858 |
| PUL    | 1792 | 375   | 373        | 16                    | 0.0429 | 13                   | 0.0349 | 3                               | 0.0080 | 357       | 0.9571 |
| PUL    | 1793 | 375   | 372        | 7                     | 0.0188 | 4                    | 0.0108 | 3                               | 0.0081 | 365       | 0.9812 |
| PUL    | 1794 | 396   | 391        | 11                    | 0.0281 | 6                    | 0.0153 | 5                               | 0.0128 | 380       | 0.9719 |
| PUL    | 1795 | 395   | 392        | 8                     | 0.0204 | 2                    | 0.0051 | 6                               | 0.0153 | 384       | 0.9796 |
| PUL    | 1796 | 422   | 410        | 4                     | 0.0098 | 2                    | 0.0049 | 2                               | 0.0049 | 406       | 0.9902 |
| PUL    | 1797 | 431   | 426        | 3                     | 0.0070 | 0                    | 0.0000 | 3                               | 0.0070 | 423       | 0.9930 |
| PUL    | 1798 | 449   | 445        | 3                     | 0.0067 | 0                    | 0.0000 | 3                               | 0.0067 | 442       | 0.9933 |
| PUL    | 1799 | 469   | 461        | 12                    | 0.0260 | 11                   | 0.0239 | 1                               | 0.0022 | 449       | 0.9740 |
| PUL    | 1800 | 471   | 469        | 12                    | 0.0256 | 8                    | 0.0171 | 4                               | 0.0085 | 457       | 0.9744 |

| Parish | Year | Alive | Known fate | Deaths of known cause |        | Deaths of infections |        | Deaths of non-infectious causes |        | Survivors |        |
|--------|------|-------|------------|-----------------------|--------|----------------------|--------|---------------------------------|--------|-----------|--------|
|        |      |       |            | N                     | Prop   | N                    | Prop   | N                               | Prop   | N         | Prop   |
| PUL    | 1801 | 478   | 475        | 3                     | 0.0063 | 1                    | 0.0021 | 2                               | 0.0042 | 472       | 0.9937 |
| PUL    | 1802 | 492   | 488        | 9                     | 0.0184 | 5                    | 0.0102 | 4                               | 0.0082 | 479       | 0.9816 |
| PUL    | 1803 | 477   | 473        | 19                    | 0.0402 | 14                   | 0.0296 | 5                               | 0.0106 | 454       | 0.9598 |
| PUL    | 1804 | 470   | 465        | 3                     | 0.0065 | 0                    | 0.0000 | 3                               | 0.0065 | 462       | 0.9935 |
| PUL    | 1805 | 472   | 468        | 6                     | 0.0128 | 2                    | 0.0043 | 4                               | 0.0085 | 462       | 0.9872 |
| PUL    | 1806 | 494   | 486        | 7                     | 0.0144 | 3                    | 0.0062 | 4                               | 0.0082 | 479       | 0.9856 |
| PUL    | 1807 | 499   | 494        | 27                    | 0.0547 | 22                   | 0.0445 | 5                               | 0.0101 | 467       | 0.9453 |
| PUL    | 1808 | 465   | 461        | 51                    | 0.1106 | 39                   | 0.0846 | 12                              | 0.0260 | 410       | 0.8894 |
| PUL    | 1809 | 413   | 408        | 22                    | 0.0539 | 19                   | 0.0466 | 3                               | 0.0074 | 386       | 0.9461 |
| PUL    | 1810 | 404   | 403        | 10                    | 0.0248 | 3                    | 0.0074 | 7                               | 0.0174 | 393       | 0.9752 |
| PUL    | 1811 | 415   | 414        | 31                    | 0.0749 | 26                   | 0.0628 | 5                               | 0.0121 | 383       | 0.9251 |
| PUL    | 1812 | 420   | 418        | 5                     | 0.0120 | 1                    | 0.0024 | 4                               | 0.0096 | 413       | 0.9880 |
| PUL    | 1813 | 441   | 440        | 11                    | 0.0250 | 10                   | 0.0227 | 1                               | 0.0023 | 429       | 0.9750 |
| PUL    | 1814 | 447   | 444        | 20                    | 0.0450 | 17                   | 0.0383 | 3                               | 0.0068 | 424       | 0.9550 |
| PUL    | 1815 | 461   | 459        | 8                     | 0.0174 | 8                    | 0.0174 | 0                               | 0.0000 | 451       | 0.9826 |
| PUL    | 1816 | 482   | 480        | 8                     | 0.0167 | 2                    | 0.0042 | 6                               | 0.0125 | 472       | 0.9833 |
| PUL    | 1817 | 503   | 498        | 20                    | 0.0402 | 15                   | 0.0301 | 5                               | 0.0100 | 478       | 0.9598 |
| PUL    | 1818 | 539   | 533        | 7                     | 0.0131 | 2                    | 0.0038 | 5                               | 0.0094 | 526       | 0.9869 |
| PUL    | 1819 | 579   | 570        | 14                    | 0.0246 | 9                    | 0.0158 | 5                               | 0.0088 | 556       | 0.9754 |
| PUL    | 1820 | 603   | 599        | 8                     | 0.0134 | 3                    | 0.0050 | 5                               | 0.0083 | 591       | 0.9866 |
| PUL    | 1821 | 638   | 635        | 8                     | 0.0126 | 5                    | 0.0079 | 3                               | 0.0047 | 627       | 0.9874 |
| PUL    | 1822 | 657   | 654        | 13                    | 0.0199 | 8                    | 0.0122 | 5                               | 0.0076 | 641       | 0.9801 |
| PUL    | 1823 | 660   | 655        | 27                    | 0.0412 | 24                   | 0.0366 | 3                               | 0.0046 | 628       | 0.9588 |
| PUL    | 1824 | 672   | 665        | 23                    | 0.0346 | 18                   | 0.0271 | 5                               | 0.0075 | 642       | 0.9654 |
| PUL    | 1825 | 697   | 687        | 42                    | 0.0611 | 28                   | 0.0408 | 14                              | 0.0204 | 645       | 0.9389 |

| Parish | Year | Alive | Known fate | Deaths of known cause |        | Deaths of infections |        | Deaths of non-infectious causes |        | Survivors |        |
|--------|------|-------|------------|-----------------------|--------|----------------------|--------|---------------------------------|--------|-----------|--------|
|        |      |       |            | N                     | Prop   | N                    | Prop   | N                               | Prop   | N         | Prop   |
| PUL    | 1826 | 678   | 676        | 14                    | 0.0207 | 6                    | 0.0089 | 8                               | 0.0118 | 662       | 0.9793 |
| PUL    | 1827 | 709   | 704        | 5                     | 0.0071 | 4                    | 0.0057 | 1                               | 0.0014 | 699       | 0.9929 |
| PUL    | 1828 | 747   | 745        | 12                    | 0.0161 | 4                    | 0.0054 | 8                               | 0.0107 | 733       | 0.9839 |
| PUL    | 1829 | 753   | 744        | 16                    | 0.0215 | 8                    | 0.0108 | 8                               | 0.0108 | 728       | 0.9785 |
| PUL    | 1830 | 770   | 763        | 23                    | 0.0301 | 19                   | 0.0249 | 4                               | 0.0052 | 740       | 0.9699 |
| PUL    | 1831 | 758   | 754        | 21                    | 0.0279 | 15                   | 0.0199 | 6                               | 0.0080 | 733       | 0.9721 |
| PUL    | 1832 | 741   | 730        | 58                    | 0.0795 | 54                   | 0.0740 | 4                               | 0.0055 | 672       | 0.9205 |
| PUL    | 1833 | 689   | 677        | 23                    | 0.0340 | 23                   | 0.0340 | 0                               | 0.0000 | 654       | 0.9660 |
| PUL    | 1834 | 683   | 679        | 13                    | 0.0191 | 6                    | 0.0088 | 7                               | 0.0103 | 666       | 0.9809 |
| PUL    | 1835 | 705   | 700        | 3                     | 0.0043 | 1                    | 0.0014 | 2                               | 0.0029 | 697       | 0.9957 |
| PUL    | 1836 | 696   | 692        | 14                    | 0.0202 | 8                    | 0.0116 | 6                               | 0.0087 | 678       | 0.9798 |
| PUL    | 1837 | 688   | 679        | 26                    | 0.0383 | 25                   | 0.0368 | 1                               | 0.0015 | 653       | 0.9617 |
| PUL    | 1838 | 678   | 677        | 9                     | 0.0133 | 4                    | 0.0059 | 5                               | 0.0074 | 668       | 0.9867 |
| PUL    | 1839 | 685   | 680        | 14                    | 0.0206 | 10                   | 0.0147 | 4                               | 0.0059 | 666       | 0.9794 |
| PUL    | 1840 | 711   | 707        | 14                    | 0.0198 | 5                    | 0.0071 | 9                               | 0.0127 | 693       | 0.9802 |
| PUL    | 1841 | 719   | 716        | 17                    | 0.0237 | 10                   | 0.0140 | 7                               | 0.0098 | 699       | 0.9763 |
| PUL    | 1842 | 738   | 729        | 11                    | 0.0151 | 8                    | 0.0110 | 3                               | 0.0041 | 718       | 0.9849 |
| PUL    | 1843 | 764   | 762        | 16                    | 0.0210 | 9                    | 0.0118 | 7                               | 0.0092 | 746       | 0.9790 |
| PUL    | 1844 | 774   | 770        | 10                    | 0.0130 | 7                    | 0.0091 | 3                               | 0.0039 | 760       | 0.9870 |
| PUL    | 1845 | 807   | 803        | 25                    | 0.0311 | 16                   | 0.0199 | 9                               | 0.0112 | 778       | 0.9689 |
| PUL    | 1846 | 794   | 784        | 36                    | 0.0459 | 22                   | 0.0281 | 14                              | 0.0179 | 748       | 0.9541 |
| PUL    | 1847 | 816   | 810        | 7                     | 0.0086 | 4                    | 0.0049 | 3                               | 0.0037 | 803       | 0.9914 |
| PUL    | 1848 | 822   | 817        | 11                    | 0.0135 | 5                    | 0.0061 | 6                               | 0.0073 | 806       | 0.9865 |
| PUL    | 1849 | 821   | 810        | 19                    | 0.0235 | 15                   | 0.0185 | 4                               | 0.0049 | 791       | 0.9765 |
| PUL    | 1850 | 849   | 842        | 33                    | 0.0392 | 26                   | 0.0309 | 7                               | 0.0083 | 809       | 0.9608 |



| Parish | Year | Alive | Known fate | Deaths of known cause |        | Deaths of infections |        | Deaths of non-infectious causes |        | Survivors |         |
|--------|------|-------|------------|-----------------------|--------|----------------------|--------|---------------------------------|--------|-----------|---------|
|        |      |       |            | N                     | Prop   | N                    | Prop   | N                               | Prop   | N         | Prop    |
| PUL    | 1851 | 848   | 823        | 10                    | 0.0122 | 7                    | 0.0085 | 3                               | 0.0036 | 813       | 35.0000 |
| PUL    | 1852 | 850   | 834        | 16                    | 0.0192 | 7                    | 0.0084 | 9                               | 0.0108 | 818       | 32.0000 |
| PUL    | 1853 | 877   | 865        | 15                    | 0.0173 | 9                    | 0.0104 | 6                               | 0.0069 | 850       | 27.0000 |
| PUL    | 1854 | 893   | 875        | 13                    | 0.0149 | 9                    | 0.0103 | 4                               | 0.0046 | 862       | 31.0000 |
| PUL    | 1855 | 936   | 902        | 22                    | 0.0244 | 16                   | 0.0177 | 6                               | 0.0067 | 880       | 56.0000 |
| RAU    | 1751 | 22    | 22         | 0                     | 0.0000 | 0                    | 0.0000 | 0                               | 0.0000 | 22        | 1.0000  |
| RAU    | 1752 | 30    | 30         | 0                     | 0.0000 | 0                    | 0.0000 | 0                               | 0.0000 | 30        | 1.0000  |
| RAU    | 1753 | 32    | 32         | 0                     | 0.0000 | 0                    | 0.0000 | 0                               | 0.0000 | 32        | 1.0000  |
| RAU    | 1754 | 35    | 35         | 0                     | 0.0000 | 0                    | 0.0000 | 0                               | 0.0000 | 35        | 1.0000  |
| RAU    | 1755 | 36    | 36         | 0                     | 0.0000 | 0                    | 0.0000 | 0                               | 0.0000 | 36        | 1.0000  |
| RAU    | 1756 | 34    | 34         | 0                     | 0.0000 | 0                    | 0.0000 | 0                               | 0.0000 | 34        | 1.0000  |
| RAU    | 1757 | 34    | 34         | 0                     | 0.0000 | 0                    | 0.0000 | 0                               | 0.0000 | 34        | 1.0000  |
| RAU    | 1758 | 30    | 30         | 0                     | 0.0000 | 0                    | 0.0000 | 0                               | 0.0000 | 30        | 1.0000  |
| RAU    | 1759 | 29    | 29         | 1                     | 0.0345 | 0                    | 0.0000 | 1                               | 0.0345 | 28        | 0.9655  |
| RAU    | 1760 | 28    | 28         | 0                     | 0.0000 | 0                    | 0.0000 | 0                               | 0.0000 | 28        | 1.0000  |
| RAU    | 1761 | 26    | 26         | 0                     | 0.0000 | 0                    | 0.0000 | 0                               | 0.0000 | 26        | 1.0000  |
| RAU    | 1762 | 24    | 24         | 0                     | 0.0000 | 0                    | 0.0000 | 0                               | 0.0000 | 24        | 1.0000  |
| RAU    | 1763 | 17    | 17         | 2                     | 0.1176 | 0                    | 0.0000 | 2                               | 0.1176 | 15        | 0.8824  |
| RAU    | 1764 | 15    | 15         | 0                     | 0.0000 | 0                    | 0.0000 | 0                               | 0.0000 | 15        | 1.0000  |
| RAU    | 1765 | 19    | 19         | 0                     | 0.0000 | 0                    | 0.0000 | 0                               | 0.0000 | 19        | 1.0000  |
| RAU    | 1766 | 18    | 18         | 0                     | 0.0000 | 0                    | 0.0000 | 0                               | 0.0000 | 18        | 1.0000  |
| RAU    | 1767 | 18    | 18         | 1                     | 0.0556 | 0                    | 0.0000 | 1                               | 0.0556 | 17        | 0.9444  |
| RAU    | 1768 | 20    | 20         | 0                     | 0.0000 | 0                    | 0.0000 | 0                               | 0.0000 | 20        | 1.0000  |
| RAU    | 1769 | 25    | 25         | 1                     | 0.0400 | 1                    | 0.0400 | 0                               | 0.0000 | 24        | 0.9600  |
| RAU    | 1770 | 26    | 26         | 0                     | 0.0000 | 0                    | 0.0000 | 0                               | 0.0000 | 26        | 1.0000  |

| Parish | Year | Alive | Known fate | Deaths of known cause |        | Deaths of infections |        | Deaths of non-infectious causes |        | Survivors |        |
|--------|------|-------|------------|-----------------------|--------|----------------------|--------|---------------------------------|--------|-----------|--------|
|        |      |       |            | N                     | Prop   | N                    | Prop   | N                               | Prop   | N         | Prop   |
| RAU    | 1771 | 30    | 30         | 0                     | 0.0000 | 0                    | 0.0000 | 0                               | 0.0000 | 30        | 1.0000 |
| RAU    | 1772 | 34    | 34         | 1                     | 0.0294 | 1                    | 0.0294 | 0                               | 0.0000 | 33        | 0.9706 |
| RAU    | 1773 | 47    | 47         | 2                     | 0.0426 | 2                    | 0.0426 | 0                               | 0.0000 | 45        | 0.9574 |
| RAU    | 1774 | 55    | 55         | 2                     | 0.0364 | 1                    | 0.0182 | 1                               | 0.0182 | 53        | 0.9636 |
| RAU    | 1775 | 61    | 61         | 1                     | 0.0164 | 0                    | 0.0000 | 1                               | 0.0164 | 60        | 0.9836 |
| RAU    | 1776 | 61    | 61         | 3                     | 0.0492 | 1                    | 0.0164 | 2                               | 0.0328 | 58        | 0.9508 |
| RAU    | 1777 | 73    | 73         | 4                     | 0.0548 | 4                    | 0.0548 | 0                               | 0.0000 | 69        | 0.9452 |
| RAU    | 1778 | 74    | 74         | 7                     | 0.0946 | 6                    | 0.0811 | 1                               | 0.0135 | 67        | 0.9054 |
| RAU    | 1779 | 77    | 77         | 1                     | 0.0130 | 1                    | 0.0130 | 0                               | 0.0000 | 76        | 0.9870 |
| RAU    | 1780 | 76    | 76         | 1                     | 0.0132 | 1                    | 0.0132 | 0                               | 0.0000 | 75        | 0.9868 |
| RAU    | 1781 | 78    | 78         | 0                     | 0.0000 | 0                    | 0.0000 | 0                               | 0.0000 | 78        | 1.0000 |
| RAU    | 1782 | 80    | 80         | 9                     | 0.1125 | 9                    | 0.1125 | 0                               | 0.0000 | 71        | 0.8875 |
| RAU    | 1783 | 76    | 76         | 2                     | 0.0263 | 2                    | 0.0263 | 0                               | 0.0000 | 74        | 0.9737 |
| RAU    | 1784 | 72    | 72         | 0                     | 0.0000 | 0                    | 0.0000 | 0                               | 0.0000 | 72        | 1.0000 |
| RAU    | 1785 | 71    | 71         | 2                     | 0.0282 | 2                    | 0.0282 | 0                               | 0.0000 | 69        | 0.9718 |
| RAU    | 1786 | 66    | 66         | 4                     | 0.0606 | 4                    | 0.0606 | 0                               | 0.0000 | 62        | 0.9394 |
| RAU    | 1787 | 60    | 60         | 6                     | 0.1000 | 6                    | 0.1000 | 0                               | 0.0000 | 54        | 0.9000 |
| RAU    | 1788 | 56    | 56         | 1                     | 0.0179 | 1                    | 0.0179 | 0                               | 0.0000 | 55        | 0.9821 |
| RAU    | 1789 | 52    | 52         | 1                     | 0.0192 | 1                    | 0.0192 | 0                               | 0.0000 | 51        | 0.9808 |
| RAU    | 1790 | 48    | 48         | 1                     | 0.0208 | 1                    | 0.0208 | 0                               | 0.0000 | 47        | 0.9792 |
| RAU    | 1791 | 51    | 51         | 0                     | 0.0000 | 0                    | 0.0000 | 0                               | 0.0000 | 51        | 1.0000 |
| RAU    | 1792 | 50    | 50         | 1                     | 0.0200 | 1                    | 0.0200 | 0                               | 0.0000 | 49        | 0.9800 |
| RAU    | 1793 | 52    | 52         | 0                     | 0.0000 | 0                    | 0.0000 | 0                               | 0.0000 | 52        | 1.0000 |
| RAU    | 1794 | 48    | 48         | 3                     | 0.0625 | 3                    | 0.0625 | 0                               | 0.0000 | 45        | 0.9375 |
| RAU    | 1795 | 44    | 44         | 2                     | 0.0455 | 2                    | 0.0455 | 0                               | 0.0000 | 42        | 0.9545 |

| Parish | Year | Alive | Known fate | Deaths of known cause |        | Deaths of infections |        | Deaths of non-infectious causes |        | Survivors |        |
|--------|------|-------|------------|-----------------------|--------|----------------------|--------|---------------------------------|--------|-----------|--------|
|        |      |       |            | N                     | Prop   | N                    | Prop   | N                               | Prop   | N         | Prop   |
| RAU    | 1796 | 45    | 45         | 4                     | 0.0889 | 4                    | 0.0889 | 0                               | 0.0000 | 41        | 0.9111 |
| RAU    | 1797 | 50    | 50         | 1                     | 0.0200 | 0                    | 0.0000 | 1                               | 0.0200 | 49        | 0.9800 |
| RAU    | 1798 | 63    | 63         | 9                     | 0.1429 | 6                    | 0.0952 | 3                               | 0.0476 | 54        | 0.8571 |
| RAU    | 1799 | 60    | 60         | 1                     | 0.0167 | 1                    | 0.0167 | 0                               | 0.0000 | 59        | 0.9833 |
| RAU    | 1800 | 65    | 65         | 6                     | 0.0923 | 6                    | 0.0923 | 0                               | 0.0000 | 59        | 0.9077 |
| RAU    | 1801 | 66    | 66         | 1                     | 0.0152 | 1                    | 0.0152 | 0                               | 0.0000 | 65        | 0.9848 |
| RAU    | 1802 | 73    | 73         | 4                     | 0.0548 | 2                    | 0.0274 | 2                               | 0.0274 | 69        | 0.9452 |
| RAU    | 1803 | 80    | 80         | 1                     | 0.0125 | 1                    | 0.0125 | 0                               | 0.0000 | 79        | 0.9875 |
| RAU    | 1804 | 89    | 89         | 4                     | 0.0449 | 4                    | 0.0449 | 0                               | 0.0000 | 85        | 0.9551 |
| RAU    | 1805 | 99    | 99         | 1                     | 0.0101 | 0                    | 0.0000 | 1                               | 0.0101 | 98        | 0.9899 |
| RAU    | 1806 | 113   | 113        | 8                     | 0.0708 | 3                    | 0.0265 | 5                               | 0.0442 | 105       | 0.9292 |
| RAU    | 1807 | 113   | 113        | 8                     | 0.0708 | 6                    | 0.0531 | 2                               | 0.0177 | 105       | 0.9292 |
| RAU    | 1808 | 106   | 106        | 7                     | 0.0660 | 5                    | 0.0472 | 2                               | 0.0189 | 99        | 0.9340 |
| RAU    | 1809 | 104   | 104        | 2                     | 0.0192 | 2                    | 0.0192 | 0                               | 0.0000 | 102       | 0.9808 |
| RAU    | 1810 | 106   | 106        | 5                     | 0.0472 | 3                    | 0.0283 | 2                               | 0.0189 | 101       | 0.9528 |
| RAU    | 1811 | 106   | 106        | 6                     | 0.0566 | 5                    | 0.0472 | 1                               | 0.0094 | 100       | 0.9434 |
| RAU    | 1812 | 109   | 109        | 4                     | 0.0367 | 2                    | 0.0183 | 2                               | 0.0183 | 105       | 0.9633 |
| RAU    | 1813 | 105   | 105        | 4                     | 0.0381 | 4                    | 0.0381 | 0                               | 0.0000 | 101       | 0.9619 |
| RAU    | 1814 | 108   | 108        | 5                     | 0.0463 | 4                    | 0.0370 | 1                               | 0.0093 | 103       | 0.9537 |
| RAU    | 1815 | 107   | 107        | 3                     | 0.0280 | 3                    | 0.0280 | 0                               | 0.0000 | 104       | 0.9720 |
| RAU    | 1816 | 98    | 98         | 8                     | 0.0816 | 3                    | 0.0306 | 5                               | 0.0510 | 90        | 0.9184 |
| RAU    | 1817 | 89    | 89         | 1                     | 0.0112 | 1                    | 0.0112 | 0                               | 0.0000 | 88        | 0.9888 |
| RAU    | 1818 | 95    | 95         | 4                     | 0.0421 | 1                    | 0.0105 | 3                               | 0.0316 | 91        | 0.9579 |
| RAU    | 1819 | 102   | 102        | 7                     | 0.0686 | 5                    | 0.0490 | 2                               | 0.0196 | 95        | 0.9314 |
| RAU    | 1820 | 97    | 97         | 4                     | 0.0412 | 3                    | 0.0309 | 1                               | 0.0103 | 93        | 0.9588 |

| Parish | Year | Alive | Known fate | Deaths of known cause |        | Deaths of infections |        | Deaths of non-infectious causes |        | Survivors |        |
|--------|------|-------|------------|-----------------------|--------|----------------------|--------|---------------------------------|--------|-----------|--------|
|        |      |       |            | N                     | Prop   | N                    | Prop   | N                               | Prop   | N         | Prop   |
| RAU    | 1821 | 88    | 88         | 4                     | 0.0455 | 3                    | 0.0341 | 1                               | 0.0114 | 84        | 0.9545 |
| RAU    | 1822 | 92    | 92         | 6                     | 0.0652 | 5                    | 0.0543 | 1                               | 0.0109 | 86        | 0.9348 |
| RAU    | 1823 | 94    | 94         | 0                     | 0.0000 | 0                    | 0.0000 | 0                               | 0.0000 | 94        | 1.0000 |
| RAU    | 1824 | 99    | 99         | 5                     | 0.0505 | 5                    | 0.0505 | 0                               | 0.0000 | 94        | 0.9495 |
| RAU    | 1825 | 100   | 100        | 5                     | 0.0500 | 4                    | 0.0400 | 1                               | 0.0100 | 95        | 0.9500 |
| RAU    | 1826 | 98    | 98         | 4                     | 0.0408 | 2                    | 0.0204 | 2                               | 0.0204 | 94        | 0.9592 |
| RAU    | 1827 | 102   | 102        | 3                     | 0.0294 | 3                    | 0.0294 | 0                               | 0.0000 | 99        | 0.9706 |
| RAU    | 1828 | 103   | 103        | 2                     | 0.0194 | 1                    | 0.0097 | 1                               | 0.0097 | 101       | 0.9806 |
| RAU    | 1829 | 110   | 110        | 3                     | 0.0273 | 2                    | 0.0182 | 1                               | 0.0091 | 107       | 0.9727 |
| RAU    | 1830 | 112   | 112        | 3                     | 0.0268 | 3                    | 0.0268 | 0                               | 0.0000 | 109       | 0.9732 |
| RAU    | 1831 | 126   | 126        | 3                     | 0.0238 | 2                    | 0.0159 | 1                               | 0.0079 | 123       | 0.9762 |
| RAU    | 1832 | 131   | 131        | 3                     | 0.0229 | 2                    | 0.0153 | 1                               | 0.0076 | 128       | 0.9771 |
| RAU    | 1833 | 131   | 131        | 8                     | 0.0611 | 2                    | 0.0153 | 6                               | 0.0458 | 123       | 0.9389 |
| RAU    | 1834 | 133   | 133        | 11                    | 0.0827 | 7                    | 0.0526 | 4                               | 0.0301 | 122       | 0.9173 |
| RAU    | 1835 | 128   | 128        | 5                     | 0.0391 | 3                    | 0.0234 | 2                               | 0.0156 | 123       | 0.9609 |
| RAU    | 1836 | 127   | 127        | 5                     | 0.0394 | 1                    | 0.0079 | 4                               | 0.0315 | 122       | 0.9606 |
| RAU    | 1837 | 136   | 136        | 7                     | 0.0515 | 5                    | 0.0368 | 2                               | 0.0147 | 129       | 0.9485 |
| RAU    | 1838 | 136   | 136        | 4                     | 0.0294 | 2                    | 0.0147 | 2                               | 0.0147 | 132       | 0.9706 |
| RAU    | 1839 | 137   | 137        | 1                     | 0.0073 | 1                    | 0.0073 | 0                               | 0.0000 | 136       | 0.9927 |
| RAU    | 1840 | 150   | 150        | 6                     | 0.0400 | 5                    | 0.0333 | 1                               | 0.0067 | 144       | 0.9600 |
| RAU    | 1841 | 149   | 149        | 5                     | 0.0336 | 3                    | 0.0201 | 2                               | 0.0134 | 144       | 0.9664 |
| RAU    | 1842 | 159   | 159        | 9                     | 0.0566 | 8                    | 0.0503 | 1                               | 0.0063 | 150       | 0.9434 |
| RAU    | 1843 | 157   | 157        | 7                     | 0.0446 | 5                    | 0.0318 | 2                               | 0.0127 | 150       | 0.9554 |
| RAU    | 1844 | 171   | 171        | 11                    | 0.0643 | 9                    | 0.0526 | 2                               | 0.0117 | 160       | 0.9357 |
| RAU    | 1845 | 174   | 174        | 19                    | 0.1092 | 14                   | 0.0805 | 5                               | 0.0287 | 155       | 0.8908 |

| Parish | Year | Alive | Known fate | Deaths of known cause |        | Deaths of infections |        | Deaths of non-infectious causes |        | Survivors |         |
|--------|------|-------|------------|-----------------------|--------|----------------------|--------|---------------------------------|--------|-----------|---------|
|        |      |       |            | N                     | Prop   | N                    | Prop   | N                               | Prop   | N         | Prop    |
| RAU    | 1846 | 157   | 157        | 10                    | 0.0637 | 8                    | 0.0510 | 2                               | 0.0127 | 147       | 0.9363  |
| RAU    | 1847 | 164   | 164        | 7                     | 0.0427 | 4                    | 0.0244 | 3                               | 0.0183 | 157       | 0.9573  |
| RAU    | 1848 | 166   | 166        | 11                    | 0.0663 | 6                    | 0.0361 | 5                               | 0.0301 | 155       | 0.9337  |
| RAU    | 1849 | 163   | 163        | 9                     | 0.0552 | 8                    | 0.0491 | 1                               | 0.0061 | 154       | 0.9448  |
| RAU    | 1850 | 168   | 168        | 9                     | 0.0536 | 4                    | 0.0238 | 5                               | 0.0298 | 159       | 0.9464  |
| RAU    | 1851 | 173   | 173        | 10                    | 0.0578 | 9                    | 0.0520 | 1                               | 0.0058 | 163       | 10.0000 |
| RAU    | 1852 | 174   | 174        | 8                     | 0.0460 | 4                    | 0.0230 | 4                               | 0.0230 | 166       | 8.0000  |
| RAU    | 1853 | 167   | 167        | 6                     | 0.0359 | 2                    | 0.0120 | 4                               | 0.0240 | 161       | 6.0000  |
| RAU    | 1854 | 186   | 186        | 13                    | 0.0699 | 7                    | 0.0376 | 6                               | 0.0323 | 173       | 13.0000 |
| RAU    | 1855 | 177   | 177        | 6                     | 0.0339 | 4                    | 0.0226 | 2                               | 0.0113 | 171       | 6.0000  |
| RYM    | 1751 | 30    | 30         | 0                     | 0.0000 | 0                    | 0.0000 | 0                               | 0.0000 | 30        | 1.0000  |
| RYM    | 1752 | 28    | 28         | 1                     | 0.0357 | 1                    | 0.0357 | 0                               | 0.0000 | 27        | 0.9643  |
| RYM    | 1753 | 26    | 26         | 0                     | 0.0000 | 0                    | 0.0000 | 0                               | 0.0000 | 26        | 1.0000  |
| RYM    | 1754 | 25    | 25         | 0                     | 0.0000 | 0                    | 0.0000 | 0                               | 0.0000 | 25        | 1.0000  |
| RYM    | 1755 | 26    | 26         | 0                     | 0.0000 | 0                    | 0.0000 | 0                               | 0.0000 | 26        | 1.0000  |
| RYM    | 1756 | 26    | 26         | 0                     | 0.0000 | 0                    | 0.0000 | 0                               | 0.0000 | 26        | 1.0000  |
| RYM    | 1757 | 25    | 25         | 0                     | 0.0000 | 0                    | 0.0000 | 0                               | 0.0000 | 25        | 1.0000  |
| RYM    | 1758 | 25    | 25         | 2                     | 0.0800 | 2                    | 0.0800 | 0                               | 0.0000 | 23        | 0.9200  |
| RYM    | 1759 | 21    | 21         | 0                     | 0.0000 | 0                    | 0.0000 | 0                               | 0.0000 | 21        | 1.0000  |
| RYM    | 1760 | 20    | 20         | 0                     | 0.0000 | 0                    | 0.0000 | 0                               | 0.0000 | 20        | 1.0000  |
| RYM    | 1761 | 23    | 23         | 1                     | 0.0435 | 0                    | 0.0000 | 1                               | 0.0435 | 22        | 0.9565  |
| RYM    | 1762 | 24    | 24         | 1                     | 0.0417 | 1                    | 0.0417 | 0                               | 0.0000 | 23        | 0.9583  |
| RYM    | 1763 | 25    | 25         | 2                     | 0.0800 | 2                    | 0.0800 | 0                               | 0.0000 | 23        | 0.9200  |
| RYM    | 1764 | 28    | 28         | 2                     | 0.0714 | 1                    | 0.0357 | 1                               | 0.0357 | 26        | 0.9286  |
| RYM    | 1765 | 26    | 26         | 0                     | 0.0000 | 0                    | 0.0000 | 0                               | 0.0000 | 26        | 1.0000  |

| Parish | Year | Alive | Known fate | Deaths of known cause |        | Deaths of infections |        | Deaths of non-infectious causes |        | Survivors |        |
|--------|------|-------|------------|-----------------------|--------|----------------------|--------|---------------------------------|--------|-----------|--------|
|        |      |       |            | N                     | Prop   | N                    | Prop   | N                               | Prop   | N         | Prop   |
| RYM    | 1766 | 29    | 29         | 1                     | 0.0345 | 1                    | 0.0345 | 0                               | 0.0000 | 28        | 0.9655 |
| RYM    | 1767 | 28    | 28         | 0                     | 0.0000 | 0                    | 0.0000 | 0                               | 0.0000 | 28        | 1.0000 |
| RYM    | 1768 | 38    | 38         | 0                     | 0.0000 | 0                    | 0.0000 | 0                               | 0.0000 | 38        | 1.0000 |
| RYM    | 1769 | 41    | 41         | 0                     | 0.0000 | 0                    | 0.0000 | 0                               | 0.0000 | 41        | 1.0000 |
| RYM    | 1770 | 43    | 43         | 0                     | 0.0000 | 0                    | 0.0000 | 0                               | 0.0000 | 43        | 1.0000 |
| RYM    | 1771 | 52    | 52         | 2                     | 0.0385 | 2                    | 0.0385 | 0                               | 0.0000 | 50        | 0.9615 |
| RYM    | 1772 | 61    | 61         | 0                     | 0.0000 | 0                    | 0.0000 | 0                               | 0.0000 | 61        | 1.0000 |
| RYM    | 1773 | 67    | 67         | 1                     | 0.0149 | 1                    | 0.0149 | 0                               | 0.0000 | 66        | 0.9851 |
| RYM    | 1774 | 72    | 72         | 1                     | 0.0139 | 1                    | 0.0139 | 0                               | 0.0000 | 71        | 0.9861 |
| RYM    | 1775 | 72    | 72         | 3                     | 0.0417 | 3                    | 0.0417 | 0                               | 0.0000 | 69        | 0.9583 |
| RYM    | 1776 | 72    | 72         | 2                     | 0.0278 | 2                    | 0.0278 | 0                               | 0.0000 | 70        | 0.9722 |
| RYM    | 1777 | 71    | 71         | 4                     | 0.0563 | 3                    | 0.0423 | 1                               | 0.0141 | 67        | 0.9437 |
| RYM    | 1778 | 75    | 75         | 0                     | 0.0000 | 0                    | 0.0000 | 0                               | 0.0000 | 75        | 1.0000 |
| RYM    | 1779 | 86    | 86         | 4                     | 0.0465 | 2                    | 0.0233 | 2                               | 0.0233 | 82        | 0.9535 |
| RYM    | 1780 | 87    | 87         | 10                    | 0.1149 | 10                   | 0.1149 | 0                               | 0.0000 | 77        | 0.8851 |
| RYM    | 1781 | 81    | 81         | 2                     | 0.0247 | 1                    | 0.0123 | 1                               | 0.0123 | 79        | 0.9753 |
| RYM    | 1782 | 84    | 84         | 2                     | 0.0238 | 2                    | 0.0238 | 0                               | 0.0000 | 82        | 0.9762 |
| RYM    | 1783 | 83    | 83         | 4                     | 0.0482 | 4                    | 0.0482 | 0                               | 0.0000 | 79        | 0.9518 |
| RYM    | 1784 | 77    | 77         | 0                     | 0.0000 | 0                    | 0.0000 | 0                               | 0.0000 | 77        | 1.0000 |
| RYM    | 1785 | 83    | 83         | 2                     | 0.0241 | 2                    | 0.0241 | 0                               | 0.0000 | 81        | 0.9759 |
| RYM    | 1786 | 87    | 87         | 0                     | 0.0000 | 0                    | 0.0000 | 0                               | 0.0000 | 87        | 1.0000 |
| RYM    | 1787 | 98    | 98         | 0                     | 0.0000 | 0                    | 0.0000 | 0                               | 0.0000 | 98        | 1.0000 |
| RYM    | 1788 | 102   | 101        | 1                     | 0.0099 | 1                    | 0.0099 | 0                               | 0.0000 | 100       | 0.9901 |
| RYM    | 1789 | 103   | 103        | 0                     | 0.0000 | 0                    | 0.0000 | 0                               | 0.0000 | 103       | 1.0000 |
| RYM    | 1790 | 108   | 108        | 4                     | 0.0370 | 3                    | 0.0278 | 1                               | 0.0093 | 104       | 0.9630 |

| Parish | Year | Alive | Known fate | Deaths of known cause |        | Deaths of infections |        | Deaths of non-infectious causes |        | Survivors |        |
|--------|------|-------|------------|-----------------------|--------|----------------------|--------|---------------------------------|--------|-----------|--------|
|        |      |       |            | N                     | Prop   | N                    | Prop   | N                               | Prop   | N         | Prop   |
| RYM    | 1791 | 107   | 106        | 1                     | 0.0094 | 1                    | 0.0094 | 0                               | 0.0000 | 105       | 0.9906 |
| RYM    | 1792 | 115   | 115        | 1                     | 0.0087 | 1                    | 0.0087 | 0                               | 0.0000 | 114       | 0.9913 |
| RYM    | 1793 | 123   | 123        | 5                     | 0.0407 | 4                    | 0.0325 | 1                               | 0.0081 | 118       | 0.9593 |
| RYM    | 1794 | 122   | 121        | 0                     | 0.0000 | 0                    | 0.0000 | 0                               | 0.0000 | 121       | 1.0000 |
| RYM    | 1795 | 133   | 133        | 6                     | 0.0451 | 5                    | 0.0376 | 1                               | 0.0075 | 127       | 0.9549 |
| RYM    | 1796 | 138   | 138        | 0                     | 0.0000 | 0                    | 0.0000 | 0                               | 0.0000 | 138       | 1.0000 |
| RYM    | 1797 | 143   | 143        | 1                     | 0.0070 | 0                    | 0.0000 | 1                               | 0.0070 | 142       | 0.9930 |
| RYM    | 1798 | 143   | 143        | 0                     | 0.0000 | 0                    | 0.0000 | 0                               | 0.0000 | 143       | 1.0000 |
| RYM    | 1799 | 153   | 153        | 4                     | 0.0261 | 4                    | 0.0261 | 0                               | 0.0000 | 149       | 0.9739 |
| RYM    | 1800 | 151   | 151        | 2                     | 0.0132 | 2                    | 0.0132 | 0                               | 0.0000 | 149       | 0.9868 |
| RYM    | 1801 | 153   | 153        | 0                     | 0.0000 | 0                    | 0.0000 | 0                               | 0.0000 | 153       | 1.0000 |
| RYM    | 1802 | 171   | 171        | 1                     | 0.0058 | 1                    | 0.0058 | 0                               | 0.0000 | 170       | 0.9942 |
| RYM    | 1803 | 174   | 174        | 3                     | 0.0172 | 3                    | 0.0172 | 0                               | 0.0000 | 171       | 0.9828 |
| RYM    | 1804 | 176   | 176        | 0                     | 0.0000 | 0                    | 0.0000 | 0                               | 0.0000 | 176       | 1.0000 |
| RYM    | 1805 | 187   | 187        | 0                     | 0.0000 | 0                    | 0.0000 | 0                               | 0.0000 | 187       | 1.0000 |
| RYM    | 1806 | 197   | 197        | 1                     | 0.0051 | 1                    | 0.0051 | 0                               | 0.0000 | 196       | 0.9949 |
| RYM    | 1807 | 198   | 198        | 2                     | 0.0101 | 2                    | 0.0101 | 0                               | 0.0000 | 196       | 0.9899 |
| RYM    | 1808 | 206   | 206        | 4                     | 0.0194 | 4                    | 0.0194 | 0                               | 0.0000 | 202       | 0.9806 |
| RYM    | 1809 | 207   | 207        | 2                     | 0.0097 | 2                    | 0.0097 | 0                               | 0.0000 | 205       | 0.9903 |
| RYM    | 1810 | 217   | 214        | 6                     | 0.0280 | 3                    | 0.0140 | 3                               | 0.0140 | 208       | 0.9720 |
| RYM    | 1811 | 220   | 220        | 3                     | 0.0136 | 3                    | 0.0136 | 0                               | 0.0000 | 217       | 0.9864 |
| RYM    | 1812 | 222   | 222        | 4                     | 0.0180 | 3                    | 0.0135 | 1                               | 0.0045 | 218       | 0.9820 |
| RYM    | 1813 | 216   | 216        | 0                     | 0.0000 | 0                    | 0.0000 | 0                               | 0.0000 | 216       | 1.0000 |
| RYM    | 1814 | 219   | 219        | 10                    | 0.0457 | 9                    | 0.0411 | 1                               | 0.0046 | 209       | 0.9543 |
| RYM    | 1815 | 225   | 224        | 3                     | 0.0134 | 3                    | 0.0134 | 0                               | 0.0000 | 221       | 0.9866 |

| Parish | Year | Alive | Known fate | Deaths of known cause |        | Deaths of infections |        | Deaths of non-infectious causes |        | Survivors |        |
|--------|------|-------|------------|-----------------------|--------|----------------------|--------|---------------------------------|--------|-----------|--------|
|        |      |       |            | N                     | Prop   | N                    | Prop   | N                               | Prop   | N         | Prop   |
| RYM    | 1816 | 234   | 233        | 6                     | 0.0258 | 6                    | 0.0258 | 0                               | 0.0000 | 227       | 0.9742 |
| RYM    | 1817 | 240   | 239        | 6                     | 0.0251 | 6                    | 0.0251 | 0                               | 0.0000 | 233       | 0.9749 |
| RYM    | 1818 | 241   | 241        | 8                     | 0.0332 | 7                    | 0.0290 | 1                               | 0.0041 | 233       | 0.9668 |
| RYM    | 1819 | 242   | 241        | 11                    | 0.0456 | 10                   | 0.0415 | 1                               | 0.0041 | 230       | 0.9544 |
| RYM    | 1820 | 233   | 230        | 7                     | 0.0304 | 6                    | 0.0261 | 1                               | 0.0043 | 223       | 0.9696 |
| RYM    | 1821 | 241   | 241        | 6                     | 0.0249 | 6                    | 0.0249 | 0                               | 0.0000 | 235       | 0.9751 |
| RYM    | 1822 | 239   | 238        | 9                     | 0.0378 | 8                    | 0.0336 | 1                               | 0.0042 | 229       | 0.9622 |
| RYM    | 1823 | 250   | 250        | 5                     | 0.0200 | 5                    | 0.0200 | 0                               | 0.0000 | 245       | 0.9800 |
| RYM    | 1824 | 261   | 260        | 13                    | 0.0500 | 12                   | 0.0462 | 1                               | 0.0038 | 247       | 0.9500 |
| RYM    | 1825 | 280   | 279        | 10                    | 0.0358 | 7                    | 0.0251 | 3                               | 0.0108 | 269       | 0.9642 |
| RYM    | 1826 | 289   | 288        | 8                     | 0.0278 | 8                    | 0.0278 | 0                               | 0.0000 | 280       | 0.9722 |
| RYM    | 1827 | 289   | 288        | 3                     | 0.0104 | 2                    | 0.0069 | 1                               | 0.0035 | 285       | 0.9896 |
| RYM    | 1828 | 297   | 296        | 6                     | 0.0203 | 4                    | 0.0135 | 2                               | 0.0068 | 290       | 0.9797 |
| RYM    | 1829 | 287   | 286        | 9                     | 0.0315 | 7                    | 0.0245 | 2                               | 0.0070 | 277       | 0.9685 |
| RYM    | 1830 | 307   | 306        | 8                     | 0.0261 | 6                    | 0.0196 | 2                               | 0.0065 | 298       | 0.9739 |
| RYM    | 1831 | 338   | 337        | 6                     | 0.0178 | 2                    | 0.0059 | 4                               | 0.0119 | 331       | 0.9822 |
| RYM    | 1832 | 321   | 321        | 4                     | 0.0125 | 3                    | 0.0093 | 1                               | 0.0031 | 317       | 0.9875 |
| RYM    | 1833 | 334   | 334        | 8                     | 0.0240 | 7                    | 0.0210 | 1                               | 0.0030 | 326       | 0.9760 |
| RYM    | 1834 | 332   | 332        | 6                     | 0.0181 | 6                    | 0.0181 | 0                               | 0.0000 | 326       | 0.9819 |
| RYM    | 1835 | 339   | 337        | 7                     | 0.0208 | 6                    | 0.0178 | 1                               | 0.0030 | 330       | 0.9792 |
| RYM    | 1836 | 346   | 346        | 5                     | 0.0145 | 2                    | 0.0058 | 3                               | 0.0087 | 341       | 0.9855 |
| RYM    | 1837 | 353   | 352        | 10                    | 0.0284 | 8                    | 0.0227 | 2                               | 0.0057 | 342       | 0.9716 |
| RYM    | 1838 | 359   | 359        | 5                     | 0.0139 | 3                    | 0.0084 | 2                               | 0.0056 | 354       | 0.9861 |
| RYM    | 1839 | 383   | 383        | 10                    | 0.0261 | 8                    | 0.0209 | 2                               | 0.0052 | 373       | 0.9739 |
| RYM    | 1840 | 404   | 404        | 6                     | 0.0149 | 6                    | 0.0149 | 0                               | 0.0000 | 398       | 0.9851 |



| Parish | Year | Alive | Known fate | Deaths of known cause |        | Deaths of infections |        | Deaths of non-infectious causes |        | Survivors |         |
|--------|------|-------|------------|-----------------------|--------|----------------------|--------|---------------------------------|--------|-----------|---------|
|        |      |       |            | N                     | Prop   | N                    | Prop   | N                               | Prop   | N         | Prop    |
| RYM    | 1841 | 398   | 396        | 3                     | 0.0076 | 1                    | 0.0025 | 2                               | 0.0051 | 393       | 0.9924  |
| RYM    | 1842 | 394   | 393        | 4                     | 0.0102 | 4                    | 0.0102 | 0                               | 0.0000 | 389       | 0.9898  |
| RYM    | 1843 | 409   | 408        | 12                    | 0.0294 | 12                   | 0.0294 | 0                               | 0.0000 | 396       | 0.9706  |
| RYM    | 1844 | 412   | 409        | 9                     | 0.0220 | 8                    | 0.0196 | 1                               | 0.0024 | 400       | 0.9780  |
| RYM    | 1845 | 409   | 409        | 3                     | 0.0073 | 2                    | 0.0049 | 1                               | 0.0024 | 406       | 0.9927  |
| RYM    | 1846 | 418   | 418        | 9                     | 0.0215 | 9                    | 0.0215 | 0                               | 0.0000 | 409       | 0.9785  |
| RYM    | 1847 | 391   | 389        | 6                     | 0.0154 | 4                    | 0.0103 | 2                               | 0.0051 | 383       | 0.9846  |
| RYM    | 1848 | 382   | 378        | 2                     | 0.0053 | 1                    | 0.0026 | 1                               | 0.0026 | 376       | 0.9947  |
| RYM    | 1849 | 390   | 386        | 4                     | 0.0104 | 1                    | 0.0026 | 3                               | 0.0078 | 382       | 0.9896  |
| RYM    | 1850 | 373   | 371        | 7                     | 0.0189 | 4                    | 0.0108 | 3                               | 0.0081 | 364       | 0.9811  |
| RYM    | 1851 | 377   | 376        | 7                     | 0.0186 | 4                    | 0.0106 | 3                               | 0.0080 | 369       | 8.0000  |
| RYM    | 1852 | 364   | 363        | 9                     | 0.0248 | 8                    | 0.0220 | 1                               | 0.0028 | 354       | 10.0000 |
| RYM    | 1853 | 362   | 357        | 17                    | 0.0476 | 16                   | 0.0448 | 1                               | 0.0028 | 340       | 22.0000 |
| RYM    | 1854 | 348   | 348        | 3                     | 0.0086 | 1                    | 0.0029 | 2                               | 0.0057 | 345       | 3.0000  |
| RYM    | 1855 | 351   | 344        | 7                     | 0.0203 | 6                    | 0.0174 | 1                               | 0.0029 | 337       | 14.0000 |

In each year, we recorded the number of individuals aged 0-10 years present in our records from each parish: HII, Hiittinen; IKA, Ikaalinen; JAA, Jaakkima; KUS, Kustavi; PUL, Pulkkila; RAU, Rautu; RYM, Rymättylä. A small proportion of these individuals were of unknown fate (death cause unrecorded or fate unrecorded), while the remainder were classified as dying of an infectious cause, a non-infectious cause, or surviving to the end of the year. Percentages are calculated using the number of individuals with known fate as the denominator. N = number of individuals; Prop = proportion of individuals.

**Table S3: The commonest causes of deaths in children aged 0-10 in seven parishes across Finland, 1751-1855.**

| <b>Rank</b> | <b>Cause</b>     | <b>Infectious</b> | <b>N</b> | <b>Percentage</b> |
|-------------|------------------|-------------------|----------|-------------------|
| 1           | Unknown disease  | 1                 | 1049     | 21.95%            |
| 2           | Accident         | 0                 | 598      | 12.51%            |
| 3           | Smallpox         | 1                 | 409      | 8.56%             |
| 4           | Respiratory      | 1                 | 362      | 7.57%             |
| 5           | Whooping cough   | 1                 | 334      | 6.99%             |
| 6           | Shigellosis      | 1                 | 302      | 6.32%             |
| 7           | Measles          | 1                 | 246      | 5.15%             |
| 8           | Fever            | 1                 | 171      | 3.58%             |
| 9           | Yeast infection  | 1                 | 134      | 2.80%             |
| 10          | Malaria          | 1                 | 126      | 2.64%             |
| 11          | Gastric problems | 0                 | 118      | 2.47%             |
| 12          | At birth         | 0                 | 113      | 2.36%             |
| 13          | Weakness         | 0                 | 110      | 2.30%             |
| 14          | Pneumonia        | 1                 | 86       | 1.80%             |
| 15          | Scarlet fever    | 1                 | 85       | 1.78%             |
| 16          | Oedema           | 0                 | 68       | 1.42%             |
| 17          | Cardiovascular   | 0                 | 54       | 1.13%             |
| 18          | Diarrhoea        | 1                 | 52       | 1.09%             |
| 19          | Typhoid fever    | 1                 | 48       | 1.00%             |
| 20          | Epilepsy         | 0                 | 47       | 0.98%             |
| 21          | Cancer           | 0                 | 43       | 0.90%             |
| 22          | Abscess          | 0                 | 39       | 0.82%             |
| 23          | Diphtheria       | 1                 | 34       | 0.71%             |
| 24          | Tuberculosis     | 1                 | 28       | 0.59%             |
| 25          | Rickets          | 0                 | 26       | 0.54%             |

A total of 4682 deaths are shown; a further 98 (2.05% of) deaths were due to eighteen separate causes, none accounting for more than 20 deaths across 105 years. Those deaths considered to be due to infectious causes are denoted with '1' in the 'Infectious' column, which was used to calculate the proportion of people alive in a given year who died of infection before the end of that year (Table S1).

**Table S4: A comparison of mixed-effects Cox proportional hazards models investigating the association between exposure to disease in early life and survival after the age of 15 and the age of 50.**

| Age group | Model                             | Structure                         | Hazard (95% CI)  | Vs | $\chi^2$ | DF | P     | AIC      |
|-----------|-----------------------------------|-----------------------------------|------------------|----|----------|----|-------|----------|
| ≥15       | 0                                 | Base                              |                  |    |          |    |       | 74788.88 |
|           | 1                                 | Disease Year 0                    | 1.00 (0.98-1.02) | 0  | 0.00     | 1  | 0.961 | 74790.54 |
|           | 2                                 | Disease Year 1                    | 1.02 (0.99-1.04) | 0  | 1.89     | 1  | 0.169 | 74787.70 |
|           | 3                                 | Disease Year 2                    | 0.99 (0.97-1.01) | 0  | 0.96     | 1  | 0.328 | 74789.52 |
|           | 4                                 | Disease Year 3                    | 1.01 (0.98-1.03) | 0  | 0.26     | 1  | 0.611 | 74790.34 |
|           | 5                                 | Disease Year 4                    | 1.01 (0.99-1.03) | 0  | 0.80     | 1  | 0.371 | 74789.66 |
|           | 6                                 | Disease Years 0-4                 | 1.02 (0.99-1.04) | 0  | 4.02     | 4  | 0.546 | 74792.18 |
|           | 7                                 | Disease Year 1 <sup>2</sup>       | 1.00 (0.99-1.01) | 2  | 0.97     | 1  | 0.325 | 74790.14 |
|           | 8                                 | Disease Year 1:Parish (Ikaalinen) | 0.95 (0.89-1.02) | 2  | 7.93     | 6  | 0.244 | 74790.46 |
|           |                                   | Disease Year 1:Parish (Jaakkima)  | 1.02 (0.95-1.11) |    |          |    |       |          |
|           | Disease Year 1:Parish (Kustavi)   | 1.04 (0.93-1.16)                  |                  |    |          |    |       |          |
|           | Disease Year 1:Parish (Pulkkila)  | 0.98 (0.90-1.06)                  |                  |    |          |    |       |          |
|           | Disease Year 1:Parish (Rautu)     | 0.99 (0.91-1.08)                  |                  |    |          |    |       |          |
|           | Disease Year 1:Parish (Rymättylä) | 0.94 (0.86-1.03)                  |                  |    |          |    |       |          |
|           | 9                                 | Disease Year 1:Social (Poor)      | 1.01 (0.95-1.06) | 2  | 0.04     | 1  | 0.843 | 74789.60 |
|           | 10                                | Disease Year 1:Sex (Female)       | 1.04 (1.00-1.09) | 2  | 3.70     | 1  | 0.054 | 74786.50 |
| ≥50       | 0                                 | Base                              |                  |    |          |    |       | 43554.98 |
|           | 1                                 | Birth year                        | 1.01 (0.98-1.04) | 0  | 0.73     | 1  | 0.394 | 43556.64 |
|           | 2                                 | Disease Year 1                    | 1.00 (0.97-1.03) | 0  | 0.00     | 1  | 0.958 | 43556.59 |
|           | 3                                 | Disease Year 2                    | 0.98 (0.95-1.01) | 0  | 1.11     | 1  | 0.293 | 43555.46 |
|           | 4                                 | Disease Year 3                    | 1.01 (0.98-1.04) | 0  | 0.46     | 1  | 0.499 | 43555.87 |
|           | 5                                 | Disease Year 4                    | 1.01 (0.98-1.05) | 0  | 0.96     | 1  | 0.327 | 43555.14 |

|    |                                   |                  |   |      |   |       |          |
|----|-----------------------------------|------------------|---|------|---|-------|----------|
| 6  | Disease Years 0-4                 | 1.02 (0.98-1.05) | 0 | 3.02 | 4 | 0.697 | 43559.85 |
| 7  | Disease Year 4 <sup>2</sup>       | 1.01 (1.00-1.02) | 5 | 6.14 | 1 | 0.013 | 43553.82 |
|    | Disease Year 4:Parish (Ikaalinen) | 0.96 (0.87-1.05) |   |      |   |       |          |
|    | Disease Year 4:Parish (Jaakkima)  | 0.96 (0.85-1.08) |   |      |   |       |          |
| 8  | Disease Year 4:Parish (Kustavi)   | 1.06 (0.92-1.23) | 5 | 6.05 | 6 | 0.418 | 43559.08 |
|    | Disease Year 4:Parish (Pulkkila)  | 1.01 (0.90-1.13) |   |      |   |       |          |
|    | Disease Year 4:Parish (Rautu)     | 1.07 (0.95-1.21) |   |      |   |       |          |
|    | Disease Year 4:Parish (Rymättylä) | 1.01 (0.89-1.16) |   |      |   |       |          |
| 9  | Disease Year 4:Social (Poor)      | 0.99 (0.91-1.07) | 5 | 0.13 | 1 | 0.719 | 43556.5  |
| 10 | Disease Year 4:Sex (Female)       | 0.95 (0.90-1.01) | 5 | 2.70 | 1 | 0.100 | 43552.57 |

The base model is described in the Materials and Methods section. For each model, a term incorporating early disease exposure in one of the first five years of life was added as either a main effect or as an interaction. The hazard and 95% confidence intervals (CI) refer to term added to the model; ‘Vs’ indicates which model the focal model was compared to;  $\chi^2$  statistics were calculated on one degree of freedom; P-values refer to likelihood ratio tests comparing a model with the indicated term included and a simpler model excluding that term. The upper part of the table shows analyses for all 7283 individuals in the dataset; the lower part shows analyses restricted to the 3822 individuals who survived to at least the age of 50. For the age group of  $\geq 15$ , the parameter estimate for model 6, which included disease exposure in each of the first five years of life as fixed effects, is that for Disease Year 1, which was the best fitting model (model 2) when the first five years were fitted separately; For the age group of  $\geq 50$ , the parameter estimate for model 6 is that for Disease Year 4, which was the best fitting model (model 5) when the first five years were fitted separately.

**Table S5: Causes of death of 7283 individuals born in seven parishes of Finland, 1751-1850, and who lived to at least the age of 15.**

| Death cause      | Infectious | CVD/stroke/cancer | N    | Total % | Deaths % | Mean age | Males | Male % | Females | Female % |
|------------------|------------|-------------------|------|---------|----------|----------|-------|--------|---------|----------|
| Survived         | NA         | NA                | 3678 | 50.50%  | NA       | 47.46    | 1701  | 48.00% | 1877    | 51.58%   |
| Tuberculosis     | 1          | 0                 | 537  | 7.37%   | 14.90%   | 49.69    | 267   | 8.28%  | 270     | 7.42%    |
| Old age          | 0          | 0                 | 493  | 6.77%   | 13.68%   | 76.94    | 211   | 6.54%  | 282     | 7.75%    |
| Typhoid fever    | 1          | 0                 | 412  | 5.66%   | 11.43%   | 45.41    | 231   | 7.16%  | 181     | 4.97%    |
| Accident         | 0          | 0                 | 315  | 4.33%   | 8.74%    | 47.37    | 211   | 6.54%  | 104     | 2.86%    |
| Pneumonia        | 1          | 0                 | 227  | 3.12%   | 6.30%    | 52.21    | 134   | 4.15%  | 93      | 2.56%    |
| Fever            | 1          | 0                 | 222  | 3.05%   | 6.16%    | 48.23    | 118   | 3.66%  | 104     | 2.86%    |
| Stroke           | 0          | 1                 | 188  | 2.58%   | 5.21%    | 60.26    | 99    | 3.07%  | 89      | 2.45%    |
| Oedema           | 0          | 0                 | 153  | 2.10%   | 4.24%    | 50.50    | 72    | 2.23%  | 81      | 2.23%    |
| Unknown disease  | 1          | 0                 | 121  | 1.66%   | 3.36%    | 59.44    | 61    | 1.89%  | 60      | 1.65%    |
| Gastric problems | 0          | 0                 | 110  | 1.51%   | 3.05%    | 55.83    | 63    | 1.95%  | 47      | 1.29%    |
| Malaria          | 1          | 0                 | 98   | 1.35%   | 2.72%    | 46.53    | 58    | 1.80%  | 40      | 1.10%    |
| Childbirth       | 0          | 0                 | 96   | 1.32%   | 2.66%    | 32.13    | 0     | 0.00%  | 96      | 2.64%    |
| Cancer           | 0          | 1                 | 89   | 1.22%   | 2.47%    | 58.16    | 44    | 1.36%  | 45      | 1.24%    |
| Respiratory      | 1          | 0                 | 71   | 0.97%   | 1.97%    | 52.21    | 33    | 1.02%  | 38      | 1.04%    |
| Cardiovascular   | 0          | 1                 | 69   | 0.95%   | 1.91%    | 54.80    | 34    | 1.05%  | 35      | 0.96%    |
| Diphtheria       | 1          | 0                 | 48   | 0.66%   | 1.33%    | 54.21    | 28    | 0.87%  | 20      | 0.55%    |
| Weakness         | 0          | 0                 | 48   | 0.66%   | 1.33%    | 68.54    | 14    | 0.43%  | 34      | 0.93%    |
| Shigellosis      | 1          | 0                 | 47   | 0.65%   | 1.30%    | 41.81    | 21    | 0.65%  | 26      | 0.71%    |
| Smallpox         | 1          | 0                 | 32   | 0.44%   | 0.89%    | 30.94    | 21    | 0.65%  | 11      | 0.30%    |
| Rheumatism       | 0          | 0                 | 27   | 0.37%   | 0.75%    | 68.63    | 11    | 0.34%  | 16      | 0.44%    |
| Diarrhoea        | 1          | 0                 | 26   | 0.36%   | 0.72%    | 45.62    | 17    | 0.53%  | 9       | 0.25%    |
| Influenza        | 1          | 0                 | 19   | 0.26%   | 0.53%    | 51.00    | 8     | 0.25%  | 11      | 0.30%    |
| Urinary problems | 0          | 0                 | 15   | 0.21%   | 0.42%    | 59.93    | 12    | 0.37%  | 3       | 0.08%    |
| Abscess          | 0          | 0                 | 14   | 0.19%   | 0.39%    | 46.50    | 6     | 0.19%  | 8       | 0.22%    |

|                |   |   |    |       |       |       |    |       |   |       |
|----------------|---|---|----|-------|-------|-------|----|-------|---|-------|
| Blood problems | 0 | 0 | 12 | 0.16% | 0.33% | 50.92 | 6  | 0.19% | 6 | 0.16% |
| Cholera        | 1 | 0 | 12 | 0.16% | 0.33% | 40.42 | 8  | 0.25% | 4 | 0.11% |
| Gout           | 0 | 0 | 10 | 0.14% | 0.28% | 55.50 | 5  | 0.15% | 5 | 0.14% |
| Hepatitis A    | 1 | 0 | 10 | 0.14% | 0.28% | 52.70 | 7  | 0.22% | 3 | 0.08% |
| Hernia         | 0 | 0 | 10 | 0.14% | 0.28% | 56.20 | 10 | 0.31% | 0 | 0.00% |

Individuals who ‘survived’ were censored, i.e. they disappeared from our study but were not recorded as dying. A further 74 (2.16%) deaths were due to a further 20 causes, none of which accounted for more than nine deaths.

**Table S6: A comparison of mixed-effects Cox proportional hazards models investigating the association between exposure to disease in early life and mortality risk from cardiovascular disease, stroke and cancer after the age of 15 and the age of 50.**

| Age group | Model                             | Structure                        | Hazard (95% CI)                   | Vs               | $\chi^2$ | DF    | P       | AIC     |  |
|-----------|-----------------------------------|----------------------------------|-----------------------------------|------------------|----------|-------|---------|---------|--|
| ≥15       | 0                                 | Base                             |                                   |                  |          |       |         | 5310.15 |  |
|           | 1                                 | Disease Year 0                   | 1.00 (0.92-1.08)                  | 0                | 0.01     | 1     | 0.904   | 5312.02 |  |
|           | 2                                 | Disease Year 1                   | 1.05 (0.97-1.13)                  | 0                | 1.52     | 1     | 0.218   | 5310.41 |  |
|           | 3                                 | Disease Year 2                   | 0.99 (0.91-1.07)                  | 0                | 0.12     | 1     | 0.734   | 5311.94 |  |
|           | 4                                 | Disease Year 3                   | 1.01 (0.93-1.09)                  | 0                | 0.03     | 1     | 0.866   | 5312.03 |  |
|           | 5                                 | Disease Year 4                   | 0.94 (0.86-1.03)                  | 0                | 1.95     | 1     | 0.162   | 5310.10 |  |
|           | 6                                 | Disease Years 0-4                | 0.94 (0.91-0.98)                  | 0                | 3.26     | 4     | 0.660   | 5316.35 |  |
|           | 7                                 | Disease Year 4 <sup>2</sup>      | 0.99 (0.96-1.02)                  | 5                | 0.18     | 1     | 0.675   | 5311.69 |  |
|           | 8                                 |                                  | Disease Year 4:Parish (Ikaalinen) | 1.10 (0.84-1.45) |          |       |         |         |  |
|           |                                   |                                  | Disease Year 4:Parish (Jaakkima)  | 1.21 (0.87-1.67) |          |       |         |         |  |
|           |                                   | Disease Year 4:Parish (Kustavi)  | 1.36 (0.90-2.04)                  | 5                | 3.17     | 6     | 0.787   | 5318.22 |  |
|           |                                   | Disease Year 4:Parish (Pulkkila) | 1.05 (0.73-1.52)                  |                  |          |       |         |         |  |
|           |                                   | Disease Year 4:Parish (Rautu)    | 1.08 (0.77-1.52)                  |                  |          |       |         |         |  |
|           | Disease Year 4:Parish (Rymättylä) | 1.00 (0.66-1.50)                 |                                   |                  |          |       |         |         |  |
| 9         | Disease Year 4:Social (Poor)      | 0.79 (0.62-1.00)                 | 5                                 | 4.17             | 1        | 0.041 | 5308.13 |         |  |
| 10        | Disease Year 4:Sex (Female)       | 1.07 (0.90-1.27)                 | 5                                 | 0.54             | 1        | 0.463 | 5311.51 |         |  |
| ≥50       | 0                                 | Base                             |                                   |                  |          |       |         | 3903.86 |  |
|           | 1                                 | Birth year                       | 0.97 (0.89-1.06)                  | 0                | 0.41     | 1     | 0.521   | 3905.22 |  |
|           | 2                                 | Year 1                           | 1.04 (0.96-1.13)                  | 0                | 0.86     | 1     | 0.354   | 3904.85 |  |
|           | 3                                 | Year 2                           | 0.99 (0.90-1.08)                  | 0                | 0.07     | 1     | 0.792   | 3905.66 |  |
|           | 4                                 | Year 3                           | 0.99 (0.90-1.09)                  | 0                | 0.08     | 1     | 0.782   | 3905.74 |  |
|           | 5                                 | Year 4                           | 0.99 (0.90-1.09)                  | 0                | 0.06     | 1     | 0.809   | 3905.74 |  |

|    |                                   |                  |   |      |   |       |         |
|----|-----------------------------------|------------------|---|------|---|-------|---------|
| 6  | Years 0-4                         | 0.99 (0.89-1.09) | 0 | 1.3  | 4 | 0.935 | 3912.02 |
| 7  | Disease Year 1 <sup>2</sup>       | 1.00 (0.99-1.02) | 2 | 0.86 | 1 | 0.353 | 3906.73 |
|    | Disease Year 1:Parish (Ikaalinen) | 1.19 (0.88-1.60) |   |      |   |       |         |
|    | Disease Year 1:Parish (Jaakkima)  | 1.20 (0.87-1.65) |   |      |   |       |         |
| 8  | Disease Year 1:Parish (Kustavi)   | 1.19 (0.73-1.95) | 2 | 3.38 | 6 | 0.76  | 3913.9  |
|    | Disease Year 1:Parish (Pulkkila)  | 1.11 (0.71-1.76) |   |      |   |       |         |
|    | Disease Year 1:Parish (Rautu)     | 1.27 (0.91-1.77) |   |      |   |       |         |
|    | Disease Year 1:Parish (Rymättylä) | 1.24 (0.86-1.79) |   |      |   |       |         |
| 9  | Disease Year 1:Social (Poor)      | 1.09 (0.86-1.39) | 2 | 1.28 | 1 | 0.258 | 3906.45 |
| 10 | Disease Year 1:Sex (Female)       | 0.86 (0.72-1.03) | 2 | 3.69 | 1 | 0.055 | 3904.12 |

The base model is described in the Materials and Methods section. For each model, a term incorporating early disease exposure in one of the first five years of life, either as a main effect or as an interaction was added: the hazard and 95% confidence intervals (CI) refer to term added to the model; ‘Vs’ indicates which model the focal model was compared to;  $\chi^2$  statistics were calculated on one degree of freedom; P-values refer to likelihood ratio tests comparing a model with the indicated tem included and a simpler model excluding that term. The upper part of the table shows analyses for all 7283 individuals in the dataset; the lower part shows analyses restricted to the 3822 individuals who survived to at least the age of 50.



**Table S7: Results from mixed-effects Cox model of mortality risk from heart disease, stroke or cancer after the age of 15.**

| <b>Hazard</b>                 | <b>Hazard (95% CI)</b> | <b><math>\chi^2</math></b> | <b>DF</b> | <b>P</b> |
|-------------------------------|------------------------|----------------------------|-----------|----------|
| <i>Fixed effects</i>          |                        |                            |           |          |
| Parish (Hiittinen)            | 1.00 (1.00-1.00)       | 14.74                      | 6         | 0.022    |
| Parish (Ikaalinen)            | 0.66 (0.48-0.91)       |                            |           |          |
| Parish (Jaakkima)             | 1.20 (0.73-1.96)       |                            |           |          |
| Parish (Kustavi)              | 0.81 (0.54-1.21)       |                            |           |          |
| Parish (Pulkkila)             | 0.71 (0.44-1.13)       |                            |           |          |
| Parish (Rautu)                | 1.31 (0.77-2.23)       |                            |           |          |
| Parish (Rymättylä)            | 0.75 (0.48-1.16)       |                            |           |          |
| Social (Rich)                 | 1.00 (1.00-1.00)       | 2.48                       | 1         | 0.115    |
| Social (Poor)                 | 1.19 (0.90-1.57)       |                            |           |          |
| Sex (Males)                   | 1.00 (1.00-1.00)       | 7.28                       | 1         | 0.007    |
| Sex (Female)                  | 0.74 (0.60-0.92)       |                            |           |          |
| IBI = 0                       | 1.00 (1.00-1.00)       | 6.6                        | 3         | 0.086    |
| IBI = 1                       | 0.75 (0.54-1.04)       |                            |           |          |
| IBI = 2                       | 0.99 (0.74-1.31)       |                            |           |          |
| IBI = 3                       | 0.74 (0.53-1.03)       |                            |           |          |
| Twin (0)                      | 1.00 (1.00-1.00)       | 0.34                       | 1         | 0.562    |
| Twin (1)                      | 1.17 (0.70-1.94)       |                            |           |          |
| Birth season (Low)            | 1.00 (1.00-1.00)       | 4.00                       | 1         | 0.046    |
| Birth season (High)           | 1.30 (1.00-1.70)       |                            |           |          |
| Disease Year 4                | 0.98 (0.90-1.08)       | 1.95                       | 1         | 0.162    |
| Disease Year 4: Social (Rich) | 1.00 (1.00-1.00)       | 4.17                       | 1         | 0.041    |
| Disease Year 4: Social (Poor) | 0.79 (0.62-1.00)       |                            |           |          |
| <i>Random effects</i>         |                        |                            |           |          |
|                               | <b>Variance (SD)</b>   |                            |           |          |
| Maternal ID                   | 0.39 (0.63)            |                            |           |          |
| Year                          | 0.01 (0.10)            |                            |           |          |

Hazards and 95% CI are shown for a one-unit change in the explanatory variable. ‘IBI’ = inter-birth interval; ‘Disease Year 4’ = disease exposure in the fourth year after birth.

**Table S8: Results from linear mixed-effects models of the association between early-life disease exposure and lifetime reproductive success (LRS), with females and males analysed separately.**

| Sex     | Model | Structure                    | Estimate | SE     | Vs | $\chi^2$ | DF   | P  | AIC     |         |
|---------|-------|------------------------------|----------|--------|----|----------|------|----|---------|---------|
| Females | 0     | Base                         | NA       | NA     | NA | NA       | NA   | NA | 2274.93 |         |
|         | 1     | Disease Year 0               | 0.0042   | 0.0098 |    | 0        | 0.18 | 1  | 0.670   | 2284.16 |
|         | 2     | Disease Year 1               | -0.0202  | 0.0112 |    | 0        | 3.25 | 1  | 0.071   | 2280.85 |
|         | 3     | Disease Year 2               | 0.0031   | 0.0108 |    | 0        | 0.08 | 1  | 0.774   | 2284.06 |
|         | 4     | Disease Year 3               | 0.0080   | 0.0106 |    | 0        | 0.57 | 1  | 0.450   | 2283.63 |
|         | 5     | Disease Year 4               | -0.0013  | 0.0108 |    | 0        | 0.01 | 1  | 0.903   | 2284.14 |
|         | 6     | Disease Years 0-4            | -0.0187  | 0.0118 |    | 0        | 3.69 | 1  | 0.596   | 2317.27 |
|         | 7     | Disease Year 1 <sup>2</sup>  | 0.0019   | 0.0033 |    | 2        | 0.29 | 1  | 0.588   | 2292.11 |
|         | 8     | Disease Year 1:Parish        |          |        |    | 2        | 3.21 | 6  | 0.782   | 2318.31 |
|         | 9     | Disease Year 1:Social (Poor) | -0.0038  | 0.0142 |    | 2        | 0.07 | 1  | 0.787   | 2289.45 |
| Males   |       | Base                         | NA       | NA     | NA | NA       | NA   | NA | 2103.46 |         |
|         | 0     | Birth year                   | 0.0013   | 0.0106 |    | 0        | 0.01 | 1  | 0.903   | 2112.69 |
|         | 1     | Year 1                       | -0.0006  | 0.0110 |    | 0        | 0.00 | 1  | 0.951   | 2112.64 |
|         | 2     | Year 2                       | 0.0009   | 0.0121 |    | 0        | 0.00 | 1  | 0.945   | 2112.45 |
|         | 3     | Year 3                       | -0.0025  | 0.0112 |    | 0        | 0.04 | 1  | 0.836   | 2112.56 |
|         | 4     | Year 4                       | 0.0068   | 0.0118 |    | 0        | 0.33 | 1  | 0.563   | 2112.17 |
|         | 5     | Years 0-4                    | 0.0071   | 0.0126 |    | 0        | 0.39 | 1  | 0.996   | 2148.42 |
|         | 7     | Disease Year 4 <sup>2</sup>  | 0.0061   | 0.0039 |    | 2        | 2.78 | 1  | 0.096   | 2120.99 |
|         | 8     | Disease Year 4:Parish        |          |        |    | 2        | 2.31 | 6  | 0.889   | 2148.96 |
|         | 9     | Disease Year 4:Social (Poor) | 0.0121   | 0.0176 |    | 2        | 0.81 | 1  | 0.367   | 2119.94 |

Lifetime reproductive success (LRS) was analysed using a Gaussian error structure on Box-Cox transformed values. The full structure of the base model and a description of subsequent models are given in the Materials and Methods section of the main text. For each model, the parameter estimate and standard error (SE) are given for the term in question and 'Vs' indicates which model the model in question was compared against using a likelihood ratio test.

**Table S9: Results from linear mixed-effects models of associations between early-life disease exposure and age at first reproduction (AFR), with females and males analysed separately.**

| Sex     | Model | Structure                    | Estimate | SE     | Vs | $\chi^2$ | DF | P     | AIC     |
|---------|-------|------------------------------|----------|--------|----|----------|----|-------|---------|
| Females | 0     | Base                         |          |        |    |          |    |       | 3511.62 |
|         | 1     | Disease Year 0               | 0.0080   | 0.0119 | 0  | 0.46     | 1  | 0.496 | 3520.21 |
|         | 2     | Disease Year 1               | -0.0224  | 0.0128 | 0  | 3.09     | 1  | 0.079 | 3517.44 |
|         | 3     | Disease Year 2               | 0.0035   | 0.0131 | 0  | 0.07     | 1  | 0.786 | 3520.39 |
|         | 4     | Disease Year 3               | 0.0199   | 0.0130 | 0  | 2.31     | 1  | 0.128 | 3518.17 |
|         | 5     | Disease Year 4               | -0.0052  | 0.0133 | 0  | 0.17     | 1  | 0.684 | 3520.27 |
|         | 6     | Disease Years 0-4            | -0.0189  | 0.0140 | 0  | 5.62     | 1  | 0.345 | 3550.26 |
|         | 7     | Disease Year 1 <sup>2</sup>  | 0.0012   | 0.0020 | 2  | 0.34     | 1  | 0.558 | 3529.69 |
|         | 8     | Disease Year 1:Parish        |          |        | 2  | 11.58    | 6  | 0.072 | 3544.81 |
|         | 9     | Disease Year 1:Social (Poor) | 0.0517   | 0.0353 | 2  | 2.14     | 1  | 0.143 | 3522.16 |
| Males   |       | Base                         |          |        |    |          |    |       | 3127.94 |
|         | 0     | Birth year                   | -0.0029  | 0.0120 | 0  | 0.06     | 1  | 0.813 | 3136.88 |
|         | 1     | Year 1                       | -0.0017  | 0.0122 | 0  | 0.02     | 1  | 0.884 | 3136.89 |
|         | 2     | Year 2                       | -0.0053  | 0.0135 | 0  | 0.15     | 1  | 0.696 | 3136.55 |
|         | 3     | Year 3                       | -0.0014  | 0.0125 | 0  | 0.01     | 1  | 0.907 | 3136.85 |
|         | 4     | Year 4                       | -0.0081  | 0.0130 | 0  | 0.39     | 1  | 0.532 | 3136.39 |
|         | 5     | Years 0-4                    | -0.0123  | 0.0140 | 0  | 1.14     | 1  | 0.951 | 3171.07 |
|         | 7     | Disease Year 4 <sup>2</sup>  | 0.0020   | 0.0042 | 2  | 0.24     | 1  | 0.627 | 3147.28 |
|         | 8     | Disease Year 4:Parish        |          |        | 2  | 4.42     | 6  | 0.620 | 3169.64 |
|         | 9     | Disease Year 4:Social (Poor) | -0.0735  | 0.0413 | 2  | 3.19     | 1  | 0.074 | 3139.77 |

Age at first reproduction (AFR) was analysed using a Gaussian error structure on Box-Cox transformed values. The full structure of the base model and a description of subsequent models are given in the Materials and Methods section of the main text. For each model, the parameter estimate and standard error (SE) are given for the term in question and 'Vs' indicates which model the model in question was compared against using a likelihood ratio test.

**Table S10: Results from linear mixed-effects models of associations between early-life disease exposure and lifetime breeding success (LBS, the number of children born to an individual during their lifetime), with females and males analysed separately.**

| Sex     | Model | Structure                    | Estimate | SE     | Vs | $\chi^2$ | DF | P     | AIC     |
|---------|-------|------------------------------|----------|--------|----|----------|----|-------|---------|
| Females | 0     | Base                         | NA       | NA     | NA | NA       | NA | NA    | 8965.92 |
|         | 1     | Disease Year 0               | 0.0630   | 0.0521 | 0  | 1.47     | 1  | 0.226 | 8970.54 |
|         | 2     | Disease Year 1               | -0.0705  | 0.0555 | 0  | 1.63     | 1  | 0.202 | 8970.25 |
|         | 3     | Disease Year 2               | -0.0114  | 0.0557 | 0  | 0.04     | 1  | 0.841 | 8971.81 |
|         | 4     | Disease Year 3               | 0.0053   | 0.0564 | 0  | 0.01     | 1  | 0.929 | 8971.82 |
|         | 5     | Disease Year 4               | -0.0118  | 0.0567 | 0  | 0.05     | 1  | 0.832 | 8971.78 |
|         | 6     | Disease Years 0-4            | -0.0650  | 0.0597 | 0  | 2.82     | 1  | 0.727 | 8992.64 |
|         | 7     | Disease Year 1 <sup>2</sup>  | 0.0009   | 0.0089 | 2  | 0.01     | 1  | 0.924 | 8979.85 |
|         | 8     | Disease Year 1:Parish        |          |        | 2  | 5.22     | 6  | 0.516 | 8986.35 |
|         | 9     | Disease Year 1:Social (Poor) | 0.0436   | 0.1463 | 2  | 0.09     | 1  | 0.771 | 8974.17 |
| Males   |       | Base                         | NA       | NA     | NA | NA       | NA | NA    | 8587.20 |
|         | 0     | Birth year                   | 0.0414   | 0.0601 | 0  | 0.48     | 1  | 0.490 | 8592.51 |
|         | 1     | Year 1                       | 0.0003   | 0.0605 | 0  | 0.00     | 1  | 0.999 | 8592.97 |
|         | 2     | Year 2                       | -0.0263  | 0.0665 | 0  | 0.16     | 1  | 0.690 | 8592.62 |
|         | 3     | Year 3                       | 0.0594   | 0.0625 | 0  | 0.91     | 1  | 0.339 | 8592.00 |
|         | 4     | Year 4                       | -0.0358  | 0.0646 | 0  | 0.31     | 1  | 0.577 | 8592.53 |
|         | 5     | Years 0-4                    | 0.0596   | 0.0673 | 0  | 1.70     | 1  | 0.889 | 8613.73 |
|         | 7     | Disease Year 3 <sup>2</sup>  | 0.0104   | 0.0192 | 2  | 1.21     | 1  | 0.272 | 8599.78 |
|         | 8     | Disease Year 3:Parish        |          |        | 2  | 2.73     | 6  | 0.842 | 8608.58 |
|         | 9     | Disease Year 3:Social (Poor) | 0.0255   | 0.1995 | 2  | 0.93     | 1  | 0.335 | 8595.37 |

Untransformed lifetime breeding success (LBS) was analysed using a Gaussian error structure. The full structure of the base model and a description of subsequent models are given in the Materials and Methods section of the main text. For each model, the parameter estimate and standard error (SE) are given for the term in question and 'Vs' indicates which model the model in question was compared against using a likelihood ratio test.

**Table S11: Results from generalized linear mixed-effects models of associations between early-life disease exposure and child survival rate (CSR, the proportion of children born to an individual that survived to age 15), with females and males analysed separately.**

| Sex     | Model | Structure                    | Estimate | SE     | Vs | $\chi^2$ | DF | P     | AIC     |
|---------|-------|------------------------------|----------|--------|----|----------|----|-------|---------|
| Females | 0     | Base                         | NA       | NA     | NA | NA       | NA | NA    | 4626.64 |
|         | 1     | Disease Year 0               | -0.0051  | 0.0197 | 0  | 0.07     | 1  | 0.793 | 4628.58 |
|         | 2     | Disease Year 1               | -0.0271  | 0.0233 | 0  | 1.33     | 1  | 0.248 | 4627.31 |
|         | 3     | Disease Year 2               | 0.0208   | 0.0222 | 0  | 0.88     | 1  | 0.348 | 4627.77 |
|         | 4     | Disease Year 3               | 0.0093   | 0.0214 | 0  | 0.19     | 1  | 0.665 | 4628.46 |
|         | 5     | Disease Year 4               | -0.0325  | 0.0225 | 0  | 2.08     | 1  | 0.149 | 4626.56 |
|         | 6     | Disease Years 0-4            | -0.0326  | 0.0235 | 0  | 4.17     | 1  | 0.526 | 4632.48 |
|         | 7     | Disease Year 4 <sup>2</sup>  | 0.0014   | 0.0064 | 2  | 0.04     | 1  | 0.833 | 4628.52 |
|         | 8     | Disease Year 4:Parish        | 0.0371   | 0.0652 | 2  | 3.95     | 6  | 0.683 | 4634.61 |
|         | 9     | Disease Year 4:Social (Poor) | 0.0512   | 0.0583 | 2  | 0.77     | 1  | 0.382 | 4627.80 |
| Males   | 0     | Base                         | NA       | NA     | NA | NA       | NA | NA    | 4275.87 |
|         | 0     | Birth year                   | -0.0138  | 0.0194 | 0  | 0.51     | 1  | 0.477 | 4277.36 |
|         | 1     | Year 1                       | 0.0257   | 0.0222 | 0  | 1.34     | 1  | 0.246 | 4276.52 |
|         | 2     | Year 2                       | 0.0186   | 0.0242 | 0  | 0.59     | 1  | 0.442 | 4277.27 |
|         | 3     | Year 3                       | -0.0059  | 0.0213 | 0  | 0.08     | 1  | 0.781 | 4277.79 |
|         | 4     | Year 4                       | 0.013    | 0.0228 | 0  | 0.32     | 1  | 0.570 | 4277.54 |
|         | 5     | Years 0-4                    | 0.0331   | 0.0243 | 0  | 3.36     | 1  | 0.645 | 4282.51 |
|         | 7     | Disease Year 1 <sup>2</sup>  | 0.0074   | 0.0065 | 2  | 1.32     | 1  | 0.251 | 4277.20 |
|         | 8     | Disease Year 1:Parish        | 0.0333   | 0.0669 | 2  | 2.93     | 6  | 0.817 | 4285.59 |
|         | 9     | Disease Year 1:Social (Poor) | -0.0589  | 0.0832 | 2  | 0.50     | 1  | 0.478 | 4278.02 |



Child survival rate was analysed using a binomial error structure, with the response variable coded as (surviving children, dead children). The full structure of the base model and a description of subsequent models are given in the Materials and Methods section of the main text. For each model, the parameter estimate and standard error (SE) are given for the term in question and ‘Vs’ indicates which model the model in question was compared against using a likelihood ratio test.

## SUPPORTING FIGURES

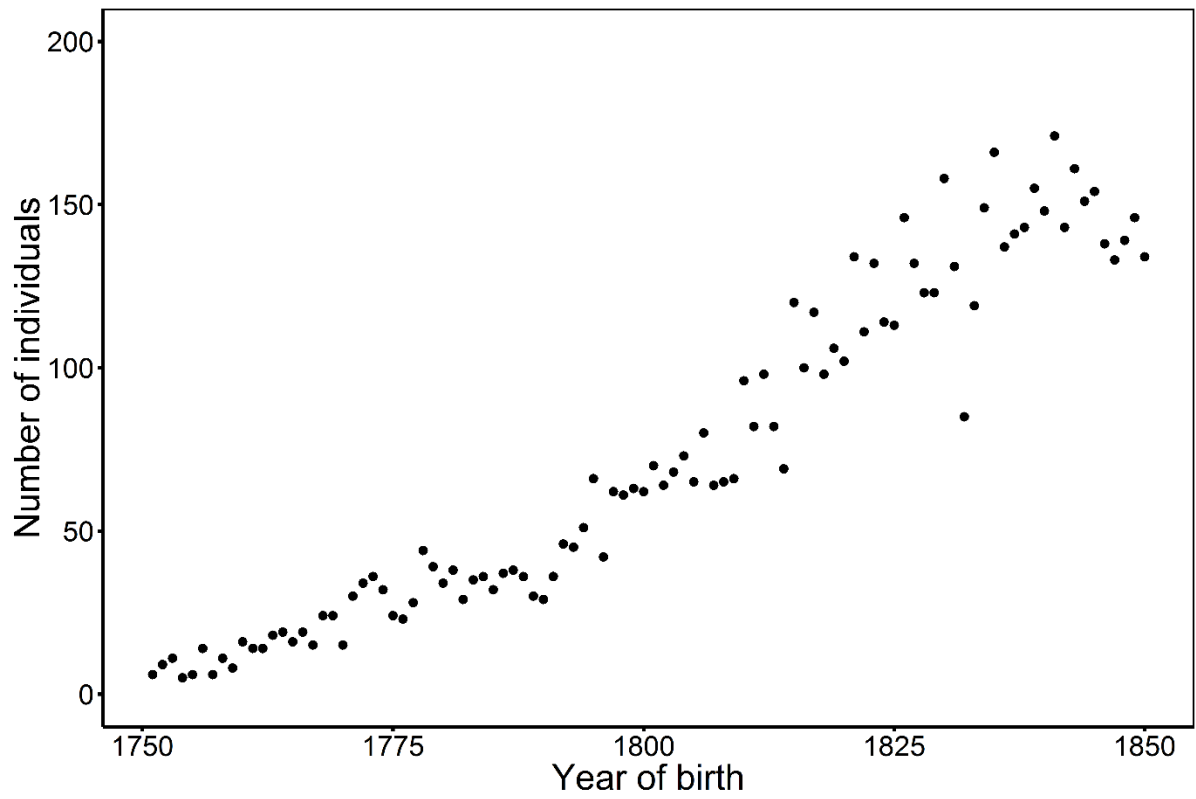

**Figure S1:** The distribution of birth years among our 7,283 focal individuals.

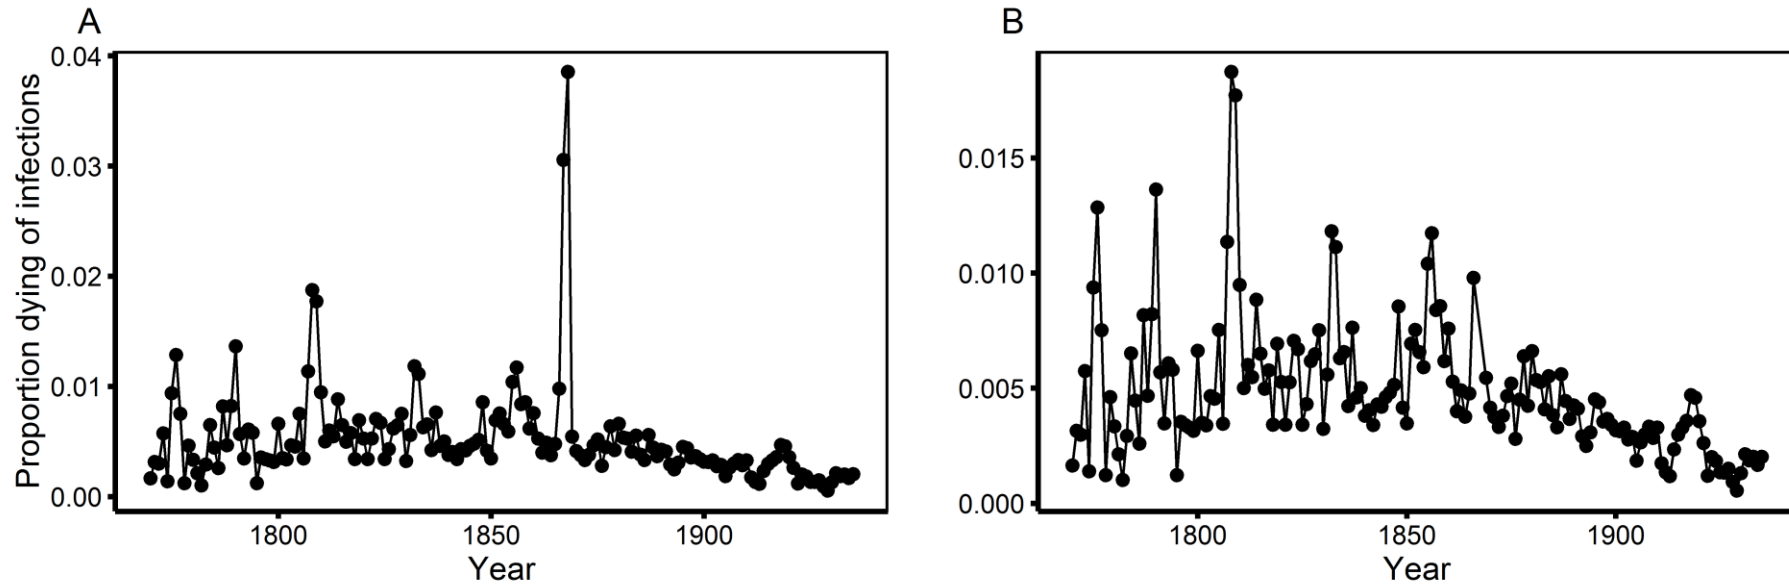

**Figure S2:** The proportion of adult-years (aged >15) ending in death from infectious disease across all parishes, 1770-1935. These years are shown since these are the years in which all but ten of our focal individuals, born 1751-1850, died in and contain 922,147 person years representing 35,011 individuals. For each year, we divided the number of adult deaths from an infectious disease by the total number of adults alive across all our parishes in that year. (A) The proportion of adults alive who died from an infectious disease declined from as high as 1% during the late 18<sup>th</sup> and early 19<sup>th</sup> century to <0.25% in the early 20<sup>th</sup> century. The high levels of mortality from infectious diseases in 1867 and 1868 were due to an infamously severe famine. (B) The data are the same as in (A), but with data for 1867 and 1868 excluded, allowing the decline in infectious disease mortality, particularly at the end of the 19<sup>th</sup> century, to be seen more clearly.
